# Supplementary material for: Defining the current scope and limitations of dual noncanonical amino acid mutagenesis in mammalian cells
Source: PubMed Central journal article supplement — Chem Sci. 2017 Aug 29;8(10):7211–7. doi: 10.1039/c7sc02560b (PMC5633785; doi:10.1039/c7sc02560b), 2017-08-29
Supplement: SC-008-C7SC02560B-s001.pdf [file SC-008-C7SC02560B-s001.pdf]

Supplementary information for:

**Defining the current scope and limitations of dual noncanonical amino acid mutagenesis in mammalian cell**

Yunan Zheng, Partha Sarathi Addy, Raja Mukherjee and Abhishek Chatterjee\*

Department of Chemistry, Boston College, 2609 Beacon Street, Chestnut Hill, MA 02467, USA.

\*email: [abhishek.chatterjee@bc.edu](mailto:abhishek.chatterjee@bc.edu)

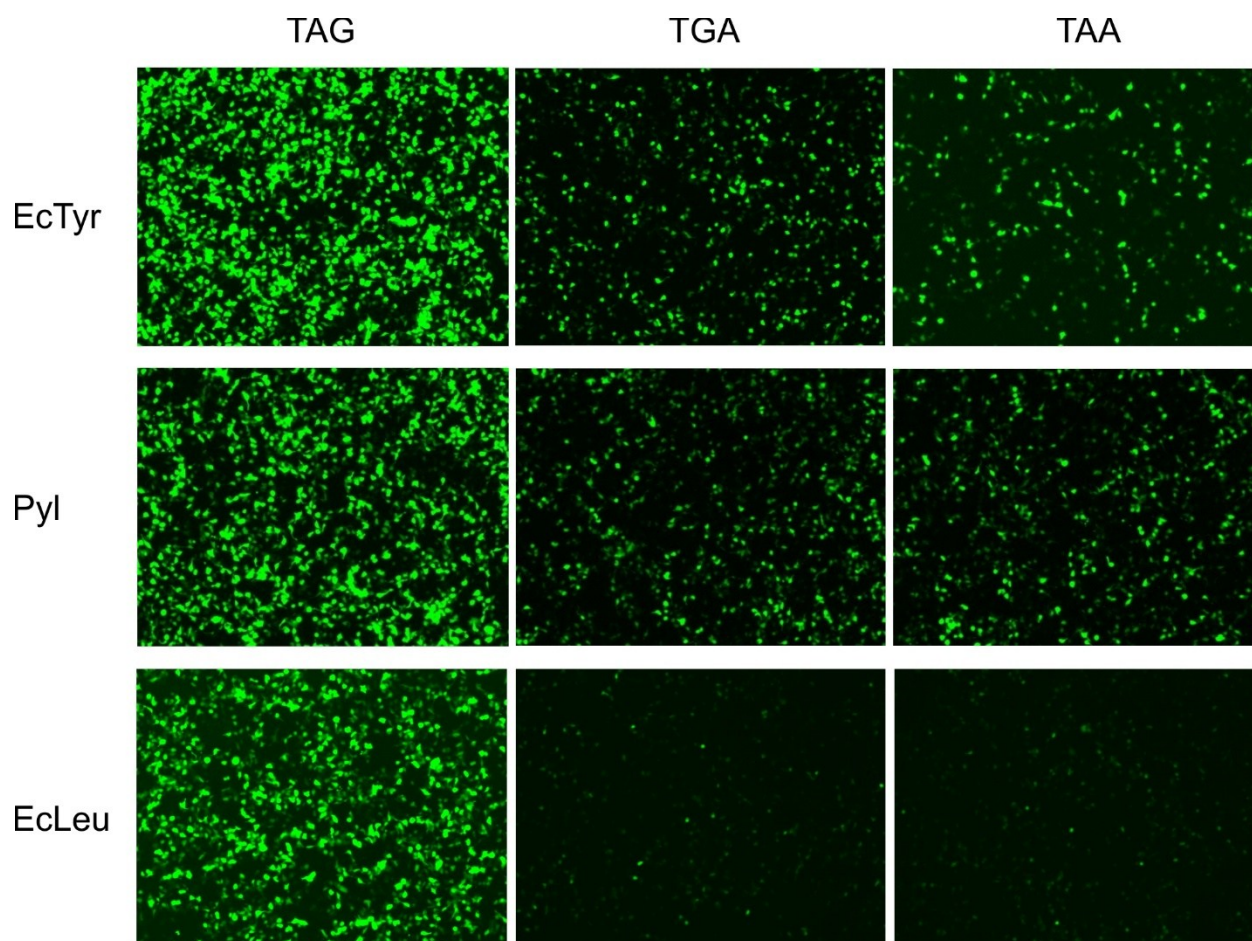

**Figure S1:** Fluorescence images of cells associated with experiments described in Figure 3A. Each aaRS is cotransfected with three different nonsense suppressors of its cognate tRNA and the appropriate EGFP-mutant to evaluate how well each pair suppresses the three different nonsense codons.

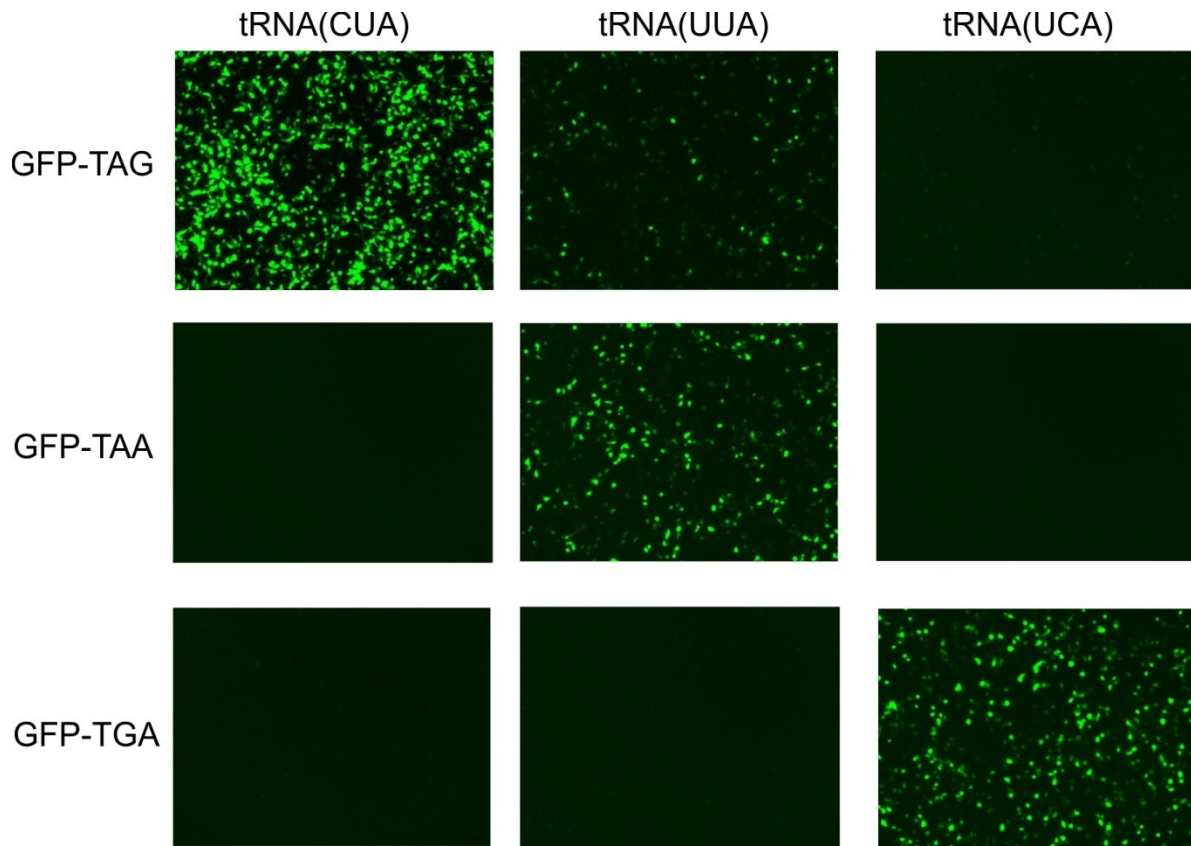

**Figure S2:** Fluorescence images of cells associated with experiments described in Figure 3B. Each of the three nonsense suppressing mutants of tRNA<sup>Py1</sup> is co-transfected with three different nonsense mutants of EGFP, as well as PyIRS, to evaluate if any of the nonsense suppressors can charge a non-cognate nonsense codon.

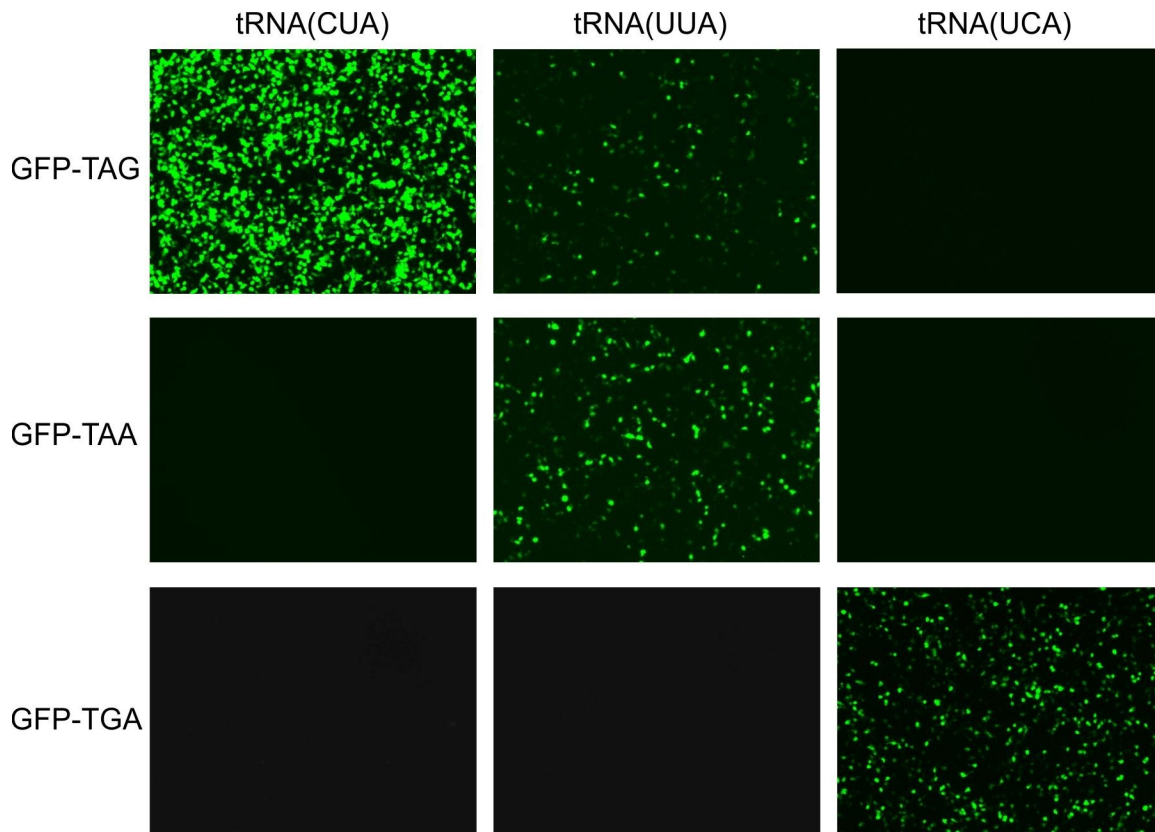

**Figure S3:** Fluorescence images of cells associated with the following experiments related to those described in Figure 3B. Each of the three nonsense suppressing mutants of tRNA<sup>EcTyr</sup> is co-transfected with three different nonsense mutants of EGFP, as well as EcTyrRS, to evaluate if any of the nonsense suppressors can charge a non-cognate nonsense codon.

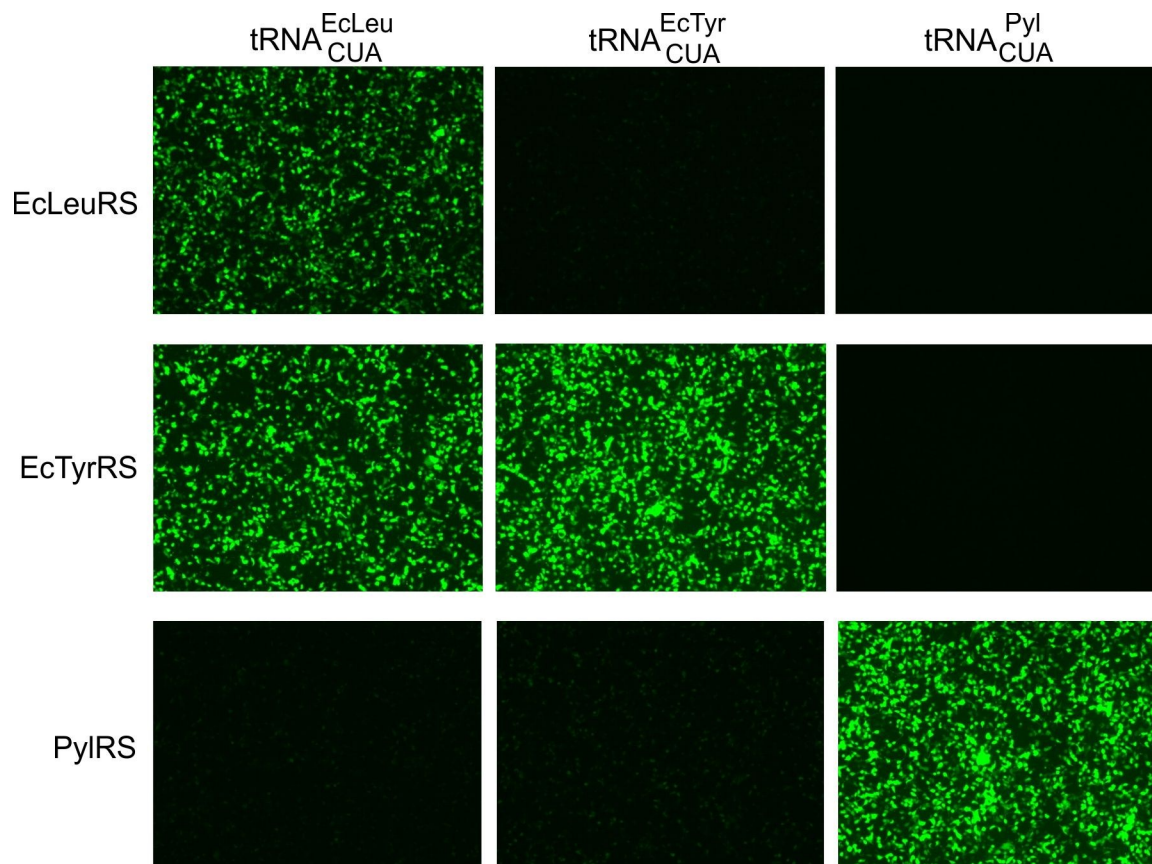

**Figure S4:** Fluorescence images of cells associated with experiments described in Figure 3C. Each of the three different aaRSs was cotransfected with the three different TAG-suppressing tRNAs, as well as EGFP-39-TAG, to identify potential aminoacylation of non-cognate tRNAs.

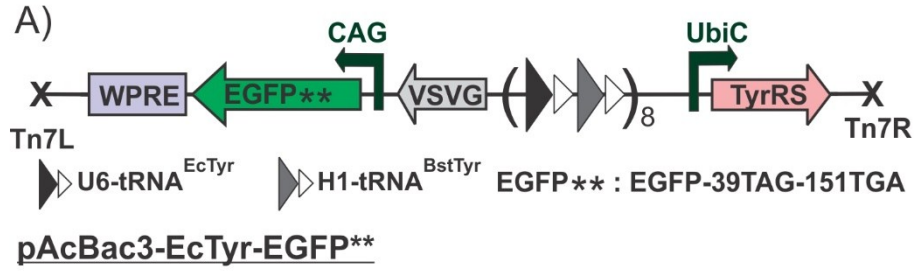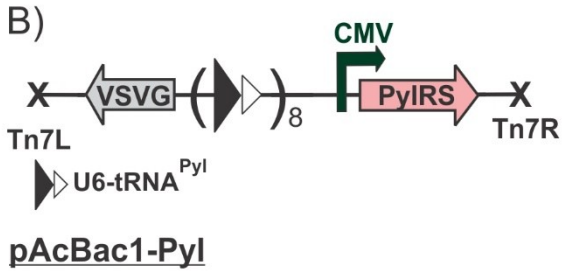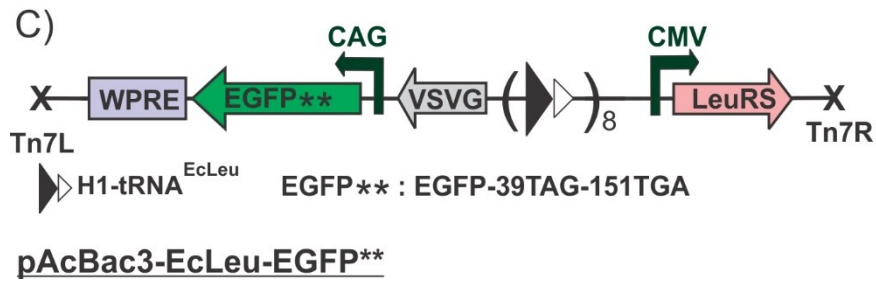

**Figure S5:** Maps for different plasmids constructed to facilitate site-specific dual ncAA incorporation.

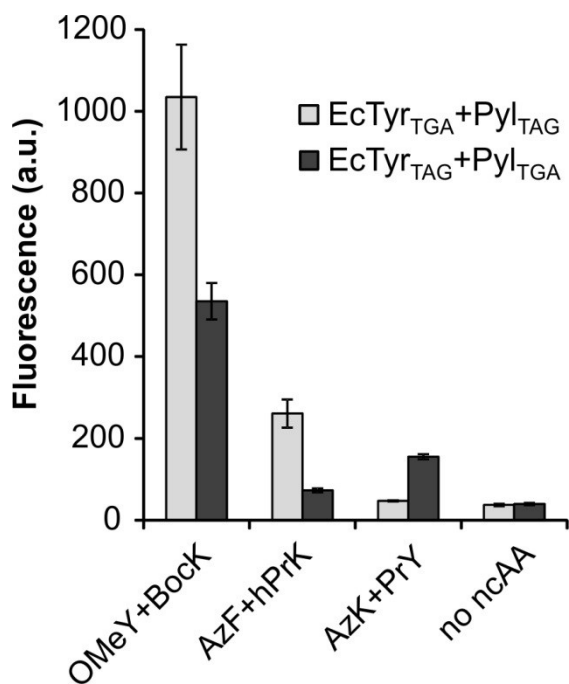

**Figure S6:** Site-specific incorporation of different combinations of two distinct ncAAs into EGFP-39-TAG-151-TGA. For each ncAA combination, efficiency of full-length EGFP expression is reported, measured by its characteristic fluorescence in cell-free extract, upon transfecting HEK293T cells with pAcBac3-EcTyr<sub>TGA</sub>-EGFP\*\* and pAcBac1-Pyl<sub>TAG</sub>, or pAcBac3-EcTyr<sub>TGA</sub>-EGFP\*\* and pAcBac1-Pyl<sub>TAG</sub>. While the former suppression systems provides higher dual ncAA incorporation yields in general, the latter system was better when incorporating AzK+PrY.

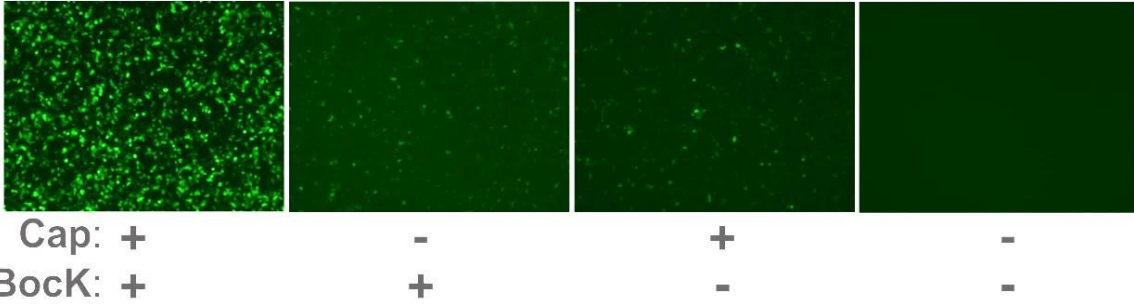

**Figure S7:** Fluorescence images of cells associated with experiments described in Figure 5B. Upon transfecting HEK293T cells with pAcBac3-EcLeu<sub>TAG</sub>-EGFP\*\* and pAcBac1-Pyl<sub>TGA</sub>, expression of EGFP-39-TAG-151-TGA is visualized in the presence or absence of the indicated ncAAs.



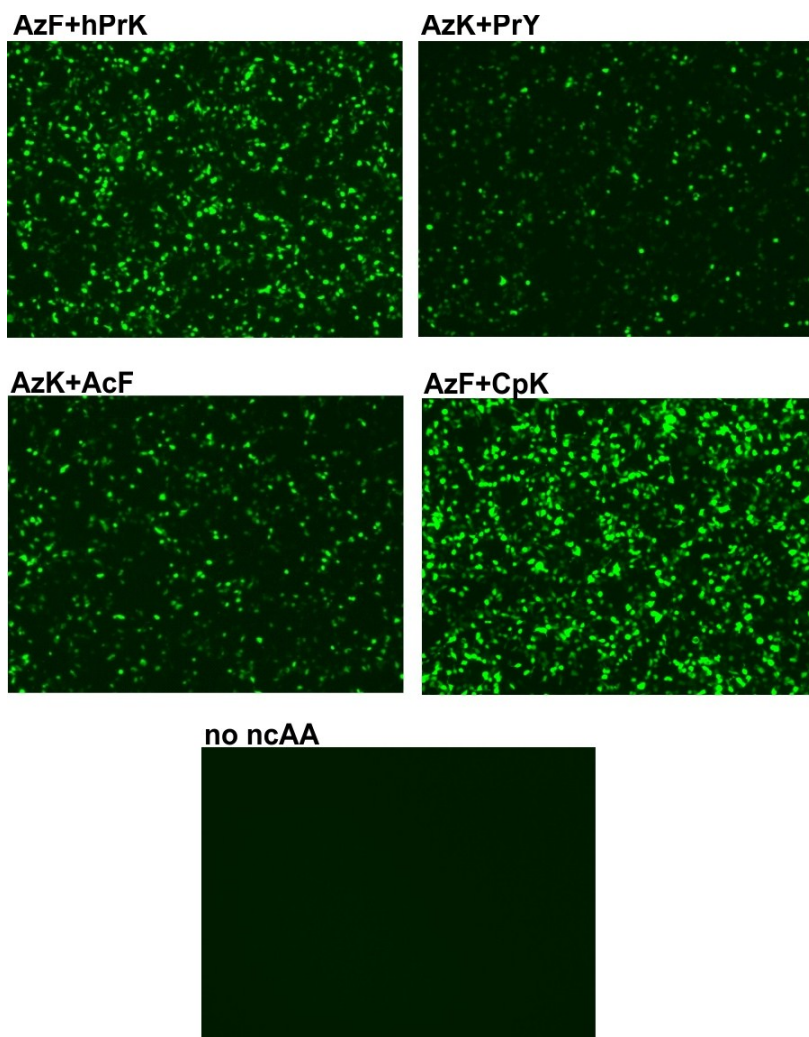

**Figure S8:** Fluorescence images of cells associated with experiments described in Figure 6A. Site-specific incorporation of two different bioconjugation handles into EGFP-39-TAG-151-TGA. A) Upon transfecting HEK293T cells with pAcBac3-EcTyr<sub>TGA</sub>-EGFP\*\* and pAcBac1-Pyl<sub>TAG</sub> (for hPrK+AzF, AzK+AcF, and CpK+AzF), or pAcBac3-EcTyr<sub>TGA</sub>-EGFP\*\* and pAcBac1-Pyl<sub>TGA</sub> (for AzK+PrY). A representative image of cells in the absence of the ncAAs was also included.

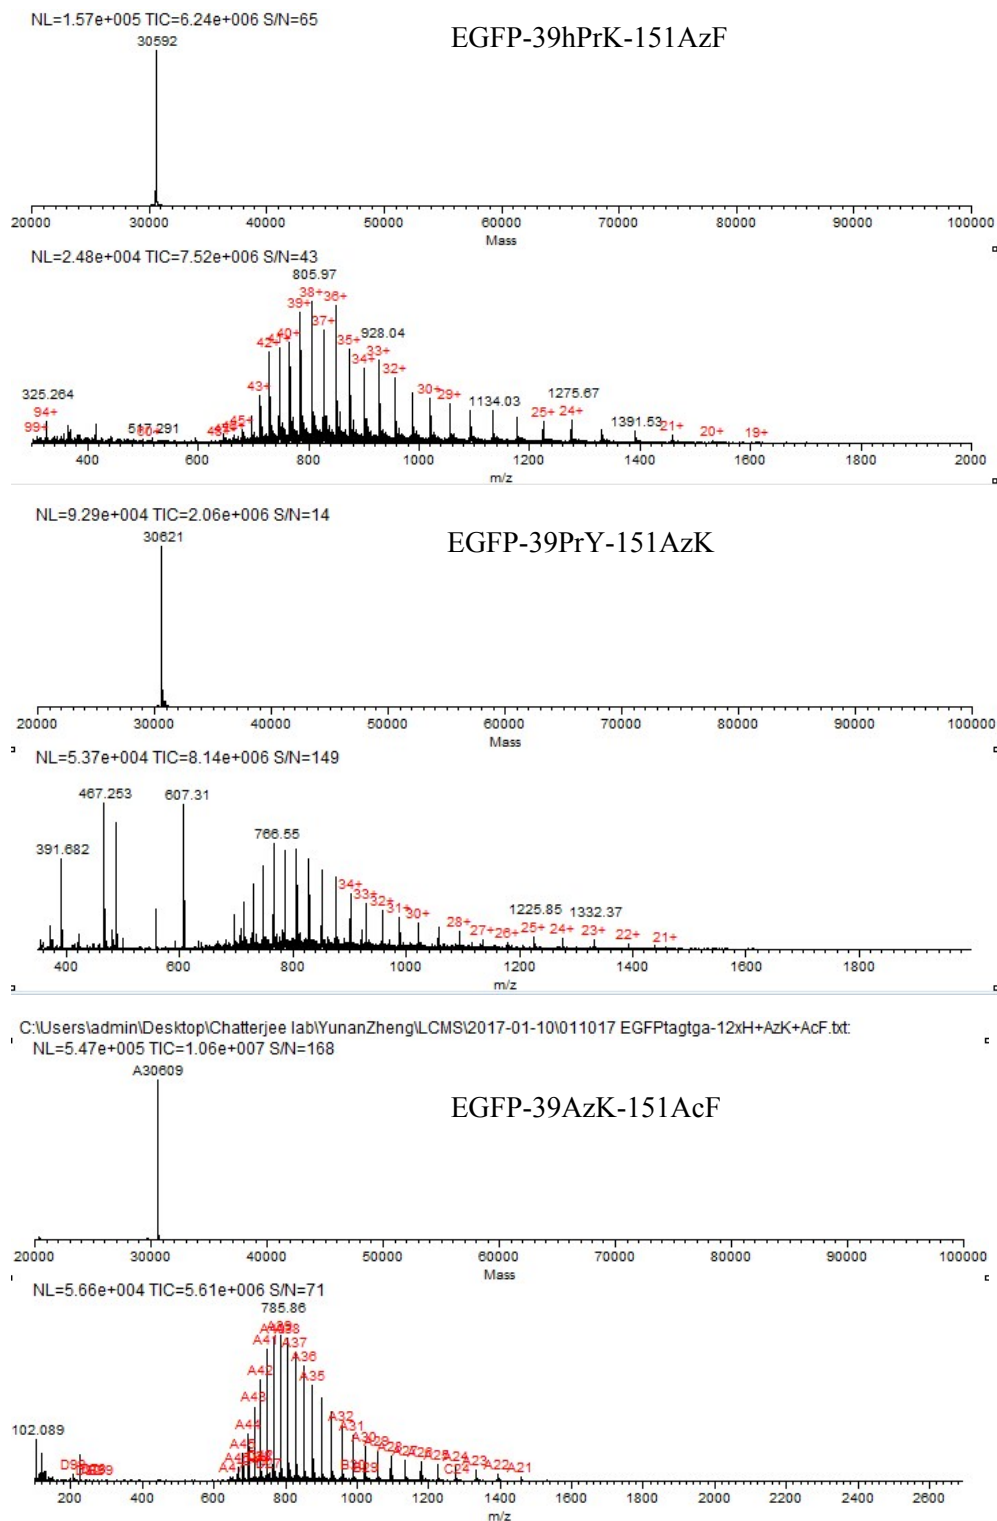

**Figure S9:** ESI-MS analysis of purified EGFP-39-TAG-151-TGA reporter incorporating indicated ncAAs. Lower panels show raw data, upper panel the deconvoluted mass. In all cases, the observed mass confirms incorporation of the desired ncAAs into indicated sites.

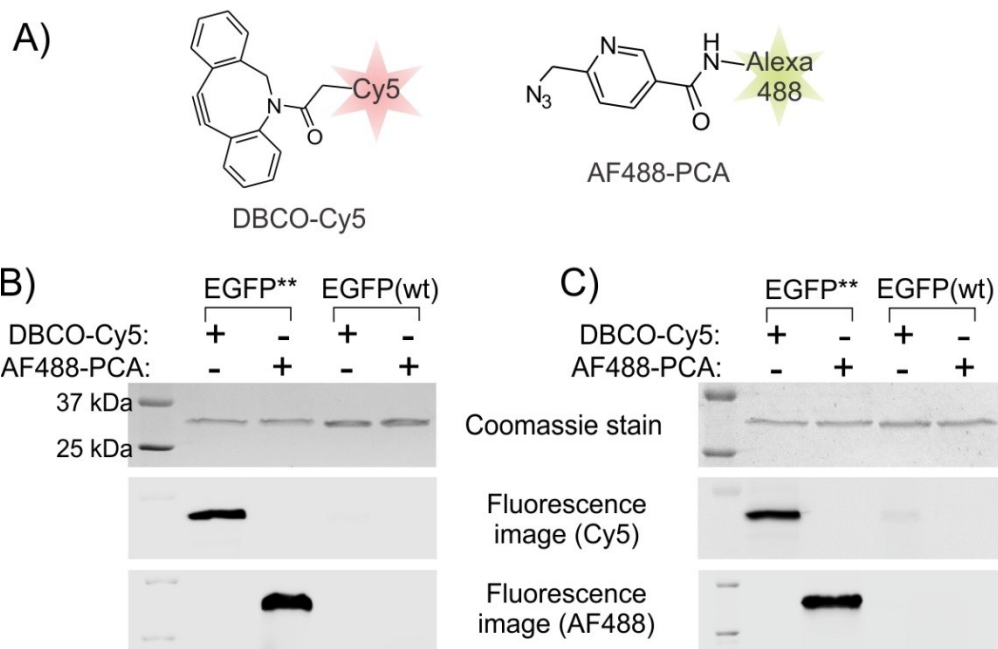

**Figure S10:** A) Structures of DBCO-Cy5 and AF488-PCA. Treating EGFP-39hPrK-151AzF (B) and EGFP-39PrY-151AzK (C) with DBCO-Cy5 or AF488-PCA (Cu(I)-catalyzed) leads to appropriate fluorescence-labeling, corroborating the presence of the alkyne and azide functionalities. Wild-type EGFP fails to undergo labeling under identical conditions.

## Materials and Methods

### General materials:

Oligonucleotides and gBlock gene fragments were obtained from IDT. Phusion Hot Start II DNA polymerase, restriction enzymes and T4 DNA ligase were purchased from Fisher Scientific. Various antibiotics were supplemented in media (bacterial culture) at following concentrations: 100 µg/mL ampicillin, 10 µg/mL gentamycin, 50 µg/mL kanamycin. TOP10 *E. coli* cells are used for cloning and plasmid propagation. For mammalian cell culture, Dulbecco's modified Eagle's medium (high glucose DMEM), trypsin 0.25% (1X) solution, Penicillin-Streptomycin (10,000 U/mL) and fetal bovine serum (FBS) were obtained from Fisher Scientific. For transient transfection, we used polyethylenimine (PEI MAX 40000) from Polysciences (Warrington, PA). For protein purification, TALON His-tag purification resin is obtained from Takara (Clontech). DNA sequencing was performed by Eton Biosciences.

### Construction of plasmids to express aaRS, tRNA or EGFP\* individually:

The previously reported pAcBac1, pAcBac2 and pAcBac3 vectors were used to generate additional plasmids.<sup>1</sup> To make a plasmid that only expresses *M. bakeri* pyrrolysyl synthetase (MbPylRS), DNA sequence encoding for MbPylRS was PCR amplified, digested with NheI/EcoRI and inserted into pAcBac1 vector. The same strategy was also used to generate a pAcBac1 plasmid that expresses *E. coli* leucyl synthetase (*EcLeuRS-AK1*).<sup>2</sup> Standard site-directed mutagenesis was used on pAcBac1-EGFP-39TAG<sup>1</sup> to create variants that encode EGFP-39TAA or EGFP-39TGA.

DNA sequence encoding one copy of *E. coli* tyrosyl tRNA<sub>CUA</sub> (tRNA<sub>CUA</sub><sup>EcTyr</sup>) driven by U6 promoter was PCR amplified from pIDT-Kan-2xtRY<sup>1</sup>, and inserted into pIDT-Kan vector between NheI and AvrII to generate pIDT-Kan-1xU6tRNA<sub>CUA</sub><sup>EcTyr</sup>. Using site-directed mutagenesis of this plasmid, pIDT-Kan-1xU6tRNA<sub>UCA</sub><sup>EcTyr</sup> and pIDT-Kan-1xU6tRNA<sub>UUA</sub><sup>EcTyr</sup> were generated, which encodes the TGA- or TAA-suppressing *E. coli* tyrosyl tRNA, respectively. DNA sequences encoding *M. maei* pyrrolysyl tRNA<sub>CUA</sub> (tRNA<sub>CUA</sub><sup>PyI</sup>) and *E. coli* leucyl tRNA<sub>CUA</sub> (tRNA<sub>CUA</sub><sup>EcLeu</sup>) were synthesized by IDT. gBlock fragments encoding these sequences were PCR amplified, digested with NheI/AvrII and insert into pIDT-Kan vector to generate pIDT-Kan-1xU6tRNA<sub>CUA</sub><sup>PyI</sup> and pIDT-Kan-1xU6tRNA<sub>CUA</sub><sup>EcLeu</sup>. Site-directed mutagenesis was later performed to generate plasmids harboring the corresponding anticodon variants: pIDT-Kan-1xU6tRNA<sub>UCA</sub><sup>PyI</sup>, pIDT-Kan-1xU6tRNA<sub>UUA</sub><sup>PyI</sup>, pIDT-Kan-1xU6tRNA<sub>UCA</sub><sup>EcLeu</sup>, and pIDT-Kan-1xU6tRNA<sub>UUA</sub><sup>EcLeu</sup>.

### Construction of plasmids for incorporating two ncAAs into EGFP:

To generate plasmids that allow the expression of five essential components (two mutually orthogonal aaRS/tRNA pairs and EGFP harboring stop codons TAG and TGA) for incorporating two distinct ncAAs, we generated four plasmids: 1) For EcTyr<sub>TGA</sub>+Pyl<sub>TAG</sub>, we made plasmids

pAcBac3-EcTyr<sub>TGA</sub>-EGFP\*\* (EGFP\*\* stands for EGFP-39TAG-151TGA) and pAcBac1-UbiC-*MbPylRS*-8xtRNA<sub>CUA</sub><sup>Pyl</sup>. 2) For EcTyr<sub>TAG</sub>+Pyl<sub>TGA</sub>, we made plasmids pAcBac3-EcTyr<sub>TAG</sub>-EGFP\*\* and pAcBac1-CMV-*MbPylRS*-8xtRNA<sub>UCA</sub><sup>Pyl</sup>.

Construction of the pAcBac3-EcTyr<sub>TAG</sub>-EGFP\*\* was performed as previously described<sup>1</sup>, except only 16 tRNA copies were incorporated (instead of 20 in the original pAcBac3). The analogous pAcBac3-EcTyr<sub>TGA</sub>-EGFP\*\* plasmid was created in a similar fashion, except only 8 tRNA copies were incorporated. To generate the pAcBac1-CMV-*MbPylRS*-8xtRNA<sub>UCA</sub><sup>Pyl</sup> plasmid, a pIDT-Kan-8xtRNA<sub>UCA</sub><sup>Pyl</sup> plasmid was first prepared containing 8 copies of tandem tRNA<sub>UCA</sub><sup>Pyl</sup>, each driven by a U6 promoter, following a procedure reported previously<sup>1</sup>. The 8xtRNA cassette was excised out of this plasmid by *NheI*/*AvrII* digestion and inserted into the *SpeI* site of the previously reported pAcBac1-*MbPylRS* plasmid. An analogous cloning strategy was used to create the corresponding TAG-suppressing plasmid pAcBac1-UbiC-*MbPylRS*-8xtRNA<sub>CUA</sub><sup>Pyl</sup>.

For the construction of the pAcBac3-EcLeu<sub>TAG</sub>-EGFP\*\* plasmid, DNA sequence encoding EcLeuRS-AK1<sup>2</sup> was PCR amplified to replace the AnapRS in the previously reported plasmid pAcBac2R-8xEcLtR-AnapRS<sup>3</sup> by *NheI* and *EcoRI* restriction enzyme sites. EGFP\*\* was then PCR amplified and inserted into the *SfiI* sites to make the final plasmid.

#### **EGFP\*\* fluorescence analysis, expression and purification:**

For small-scale expression analysis, HEK293T cells were seeded at a density of 600,000 cells per well for a 12-well plate the day before transfection. A total amount of 1.2 µg DNA + 4 µl PEI + 20 µl DMEM was used for transfection of each well. For the modular three-plasmid transfection, 0.4 µg of each plasmid is used. For two-plasmid transfections, 0.6 µg of each plasmid is used. Fluorescence images and EGFP expression analysis were performed 48 hours post transfection. To obtain EGFP expression data, cells were harvested and lysed as described before<sup>1</sup>. EGFP fluorescence in lysate was collected in a 96-well plate using a SpectraMAX M5 (Molecular Devices) (ex=480 nm and em=530 nm). Mean of three independent experiments were reported, and error bars represent standard deviation. For larger scale protein expression incorporating two ncAAs, HEK293T cells were seeded in 100 mm cell culture dishes (5 million per dish) two days before transfection. A total amount of 12 µg DNA + 50 µl PEI + 200 µl DMEM was used to transfect cells that are between 80% - 90% confluency. The ncAAs were supplemented at 1 mM final concentration at the time of transfection. Cells were harvested 48 hours post-transfection, lysed with CellLytic M, and the C-terminally polyhistidine tagged protein was purified using cobalt-containing TALON metal affinity resin (Clontech) following manufacturer's protocol. Purified proteins were subjected to SDS-PAGE gels and ESI-MS (Agilent TOF HPLC-MS) for further characterization.

## Protein labeling, and MS analysis:

For click-labeling the EGFP\*\* protein incorporating either AzF+hPrK or PrY+AzK, 1  $\mu$ g of purified EGFP\*\* was incubated with 20  $\mu$ M DBCO-Cy5 (Sigma) or 50  $\mu$ M Alexa Fluor 488 picolyl azide (Fisher Scientific), respectively, for 2 hours at room temperature. Identical reactions were set up with wild-type EGFP as control experiments. For labeling EGFP-39CpK-151AzF, 5  $\mu$ M of protein was incubated with 50  $\mu$ M DBCO-TAMRA (Click Chemistry Tools, AZ) followed by 200  $\mu$ M tetrazine-fluorescein,<sup>4</sup> at room temperature in PBS for 30 min each. Subsequently, the reaction product was subjected to SDS-PAGE and HPLC-coupled ESI-MS analysis.

## List of Primers:

EcLtr-Nhe-R: aataatGCTAGCAAAAAATACCCGGAGCGGGACTTGAACC  
MmPytR-Nhe-R: aataatgctagcAAAAACGGAAACCCCGGGAATCTAACCCG  
EcYtR-Nhe-R: aataatGCTAGCAAAAAATGGTGGGGGAAGGATTCG  
BstYtR-Nhe-R: aataatGCTAGCAAAAAATGGAGGGGGACGGATTCG  
U6-AvrII-F: aataatCCTAGGTCGGGCAGGAAGAGGGC  
H1-AvrII-F: aataatCCTAGGAATTCGAACGCTGACGTCATCAACC  
EGFP-SfiI-F: aataatGAATTGGCCAAGGCGGCCACCATGGTG  
12xHis-SfiI-R:  
AATTCGGCCTTAGAGGCCTTAATGATGGTGATGGTGATGATGGTGATGGTGATGATGACC  
LeuRS-NheI-F: aataatGGCTAGCGTTTAAACTTAAGCTTGCCGCCACCATGGAAGAGCAATACC  
LeuRS-EcoRI-R: attattaGAATTCTTAAACGGGCCCGCCAACGACCAGATTGAG

## References:

1. Y. Zheng, T. Lewis Jr, P. Igo, F. Polleux and A. Chatterjee, *ACS Synth. Biol.*, 2017, **6**, 13-18.
2. H. W. Ai, W. Shen, E. Brustad and P. G. Schultz, *Angew. Chem. Int. Ed.*, 2010, **49**, 935-937.
3. A. L. Mitchell, P. S. Addy, M. A. Chin and A. Chatterjee, *ChemBioChem*, 2017, **18**, 511-514.
4. K. Lang, L. Davis, S. Wallace, M. Mahesh, D. J. Cox, M. L. Blackman, J. M. Fox and J. W. Chin, *J. Am. Chem. Soc.*, 2012, **134**, 10317-10320.

**Plamids sequences:**

pAcBac3-EcTyr<sub>TGA</sub>-EGFP\*\*: *EcTyrRS* sequence is colored orange, EGFP\*\* is colored green. U6 promoter is colored blue. tRNA<sub>UCA</sub><sup>EcTyr</sup> is colored red. H1 promoter is colored magenta. tRNA<sub>UCA</sub><sup>BstTyr</sup> is colored cyan.

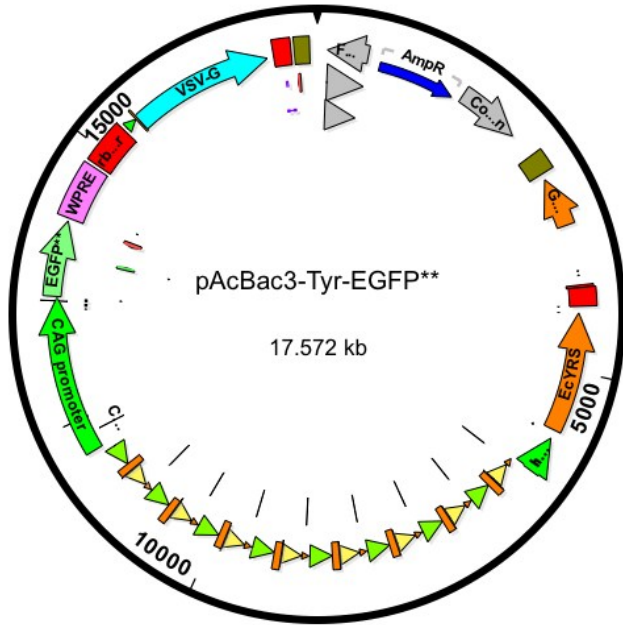

ttctctgtcacagaatgaaaatcttctgtcatctcttcgttataatgttgtaattgactgaatatcaacgcttatttgcagcctgaatggcgaatgggacgcgc  
cctgtagcggcgattaagcgcggcggtgtggtgttacgcgcagcgtgaccgctacacttgcagcgcctagcggccgctcttccgttcttccct  
tcttctcgcacgctcgcggcttccccgtcaagctctaaatcgggggtccctttaggggtccgatttagtgctttacggcacctcgacccccaaaaact  
tgattaggggatggttcacgtagtggccatcgccctgatagacggttttcgcccttgacggtggagtcacggttcttaatagtgactctgttccaac  
tggacaacactcaacctatctcggctattctttgattataaggatttggcgttcggcctattggttaaaaaatgagctgatttaacaaaaatfaacg  
cgaatttaacaaaatattaacgtttacaattcaggtggcacttttcggggaatgtgcgcggaacctattgtttattttctaaatacattcaaatatgtatc  
cgctcatgagacaataacctgataaatgctcaataatgaaaaaggaagagtatgattcaacattccgtgtcgccttattcccttttgcggcatt  
ttgccttctgttttctcaccagaaacgctggtgaaagtaaaagatgctgaagatcagttgggtgcacgagtggttacatcgaactggatctcaacag  
cgtaagatccttgagagtttgcggcgaagaacgtttccaatgatgagcactttaaagtctgctatgtggcgcggtattatcccgtattgacgccgggc  
aagagcaactcggctcggcatacactattctcagaatgacttgggtgagtactaccagtcacagaaaagcatcttacggatggcatgacagtaagaga  
attatgcagtgctgcataacctgagtgataacactgcggccaacttacttctgacaacgatcggaggaccgaaggagtaaccgctttttgcacaacat  
gggggatcatgtaactgccttgatcgttgggaaccggagctgaatgaagccatacacaacgacgagcgtgacaccacgatgctgtagcaatggcaa  
caacgttgcgcaactattaactggcgaactacttactctagcttcccggcaacaattaatagactggatggaggcggataaagttgcaggaccacttctg  
cgctcggcccttccggctggctgtttattgctgataaatcggagccggtgagcgtgggtctcgggtatcattgcagcactggggccagatgtaagc  
ctcccgtatcgtattctacacgacggggagtcaggcaactatggatgaacgaatagacagatcgtgagataggtgcctcactgattaagcattgg  
taactgtcagaccaagttactcataatactttagattgatttaaaactcattttaatftaaaaggatctaggtgaagatccttttgataatctcatgacaaaa  
tcccttaacgtgagtttctccactgagcgtcagaccccgtagaaaagatcaaaaggatctcttgagatcctttttctgcgcgtaactgctgcttgc  
caaaaaaccaccgctaccagcgggtggttggccgatcaagagctaccaactcttttccgaaggtaactggcttcagcagagcgcagatacacaat  
actgtccttctagtgtagccgtagtttagccaccactcaagaactctgtagcaccgctacatacctcgtctgtaactcctgttaccagtggtgctgcca  
gtggcgataagtcgtgtcttaccgggttgactcaagacgatagttaccggataaggcgcagcggctgggctgaacggggggtctgtcacacagccc

agcttggagcgaacgacctacaccgaactgagatacctacagcgtgagcattgagaaagcgcacgctcccgaaggagaaaggcggacaggtatc  
cggtaagcggcagggtcggaaacaggagagcgcacgagggagctccagggggaaacgcctggatctttatagctctcgggttccacacctga  
cttgagcgtcattttgtgatgctcgtcagggggggcggagcctatggaaaaacccagcaacgcggccttttacggftcctggccttttgcctgtttg  
ctcacatgttcttctcgttatcccctgattctgtggataaccgtattaccgctttgagtgagctgataccgctcggcagccgaacgaccgagcgca  
gagtgagtgagcaggaagcggagagcgcctgatcggtattttccttacgcatctgtcggatttccacaccgagaccagccgctaacctg  
gcaaaatcggttacgggtgagtaataatggatgccctgcgtaagcgggtgtggcggacaataaagtcttaactgaacaaatagatctaaactatgac  
aataaagtctaaactagacagaatagttgaaactgaaatcagtcagttatgctgtgaaaaagcatactggacttttattggctaaagcaaaccttctatt  
ttctgaagtcaaatgcccgtctatfaaagaggggcgtggccaaggcagtgtaaaagactatattcggcgcttgacaatttaccgaacaactccgc  
ggccgggaagccgatctcggctgaacgaattgtaggtggcggacttgggtcgcgatcaaaagtcatcacttctcccgtatgccaactttgatagag  
agccactcgggatcgtcaccgtaatctgctgcacgtagatcacataagcacaagcgcgtggcctcatgcttgaggagattgatgagcgggtggc  
aatgccctgcctccgggtgctcggcggagactgcgagatcatagatagatctactacgcggtgctcaaacctgggcagaacgtaagccgagag  
cgcaacaaccgcttcttgctgaaggcagcaagcgcgatgaatgcttactacggagcaagttcccaggtaatcgagtcggctgatgtgggagt  
agggtggctacgtctccgaactcacgaccgaaagatcaagagcagcccgatggattgacttggctcagggccgagcctacatgtcgaatgatccca  
tacttgagccacctaaactttgtttaggcgcactgcccctgctgcaaacatcgttctgctgcaaacatcgttctgctccataacatcaaacatcagcccac  
ggcgtaacgccttctgcttggatgcccaggcatagactgtcaaaaaaacgctatacaaacgcatgaaaaccgcccactgcccgttaccaccgct  
gcttcggtaaggttctggaccagttgctgagcgcatacgtacttgcaaacaggtttacgaaccgaacaggttatgtaactgggtcgtgcttctac  
cgtttccacgggtgctcaccggcaacctgggcagcagcgaagtcgaggaacttctgctcggctggcgaacgagcgaaggttccgctccacg  
catcgtcaggcattggcggccttctgttctctacggcaaggtgctgacggatctgcccctggctcaggagatcggtagacctcggcctcggcgc  
gcttgcgggtggtgctgaccccgatgaagtggctcgcacctcgggtttctggaagcgcagcatcgtttgtccaggactctagctatagttctagtg  
gttggcctacgtaccgtagtggtatggcagggcttgccttaatgcggcgtacagggcgcgtggggataccccctagagccccagctggttcttcc  
gcctcagaagccatagagcccaccgcatccccagcatcctgctattgtcttccaatctcccccttgcctgctcctccccccccccccagaataga  
atgacacctactcagacaatgcgatgcaatttctcattttataggaaaggacagtgaggagtgccacctccagggtaaggaaggcacgggggaggg  
gcaacaacagatggctggaactagaaggcagctcagggctgatcagcgggttaaacgggcccctctagactcagftaaagtcgacttaacgcgtt  
gaattctaaacgggccccttccagcaaatcagacagtaattctttaccgacgcagtaaggtaaaacgaccaaacagacgatcttctttaaagaag  
tattcaggatcggactgttttaccgtaatggtgatggcattggaggcagatgtttacgtgacctgaccacgggaagggtcagttcagaatcagaccagtg  
cctgcatcaggtctgcgcccttccatctcaacctcggtagccgctcctgcgccagctgttcgaagtccgcttcaactcagcgcactcaagaaccgctg  
aacaggcattcggtaatacgttttccgctgtaaaccttctcaccgtgaaccagacgagtcacctgctccgccagtaatactgggcgcgcgggtcctta  
ccgctgttttctcttctccagggcgttgatctctcaatgctcaaaaggtgaagaactcaggaagcggtaaacgctggcatccgagctgtgatcca  
gaactggtagaattgtacgggctggtttctcgggtccaaccagactgcgccgctcagtttaccaaatttggtgccatctgctttagtgatcagcggaa  
cggtcaggccaacacctgattctgatgcagacgacgggtcaggtcagaccagaagtgtgttaccctggtcagaaccaccaatgtcagcacca  
caccgtactgtttgtCAAcagggcctacTataacctgCagcaggtgttagaaaactcagtgaaacgaaatcccctgaTcttcacgggtgagacgc  
tcttaaccgcttcttggatcatctggttaacggagaagtgttccaatctcgcgcaggaaggtcagcaccattcatattgccgaaccagtcataattattg  
gccgcgatagcagagtttctccacagtcgaaatcgaggaacggggcaacctgcttacggattttgtccaccactctgaacagtttctcgggttcagc  
ttacgctcggcagctttgaagctcgggtcggcaatcagaccgtcgcgccgctaccagcgaaccggcttgggcccgctgctggaagcgtttcagg  
catacaatggaacaagatgccccaaatgcaagctgtcagcggtaggatcgaagccacaCACgagtgcgatcggccttgcgccagtcgctgct  
aacgcttctcgtcctcactgggctaccagccccgctcttgcattgtttaatcaagttactgcttccatGGTGGCgctagccagcttgggtctcc  
ctatagtgagctgattatcttctgataagccagtaagcagtggggttctctagttagccagagagctCtagaccaagtacgatcacagcgtccacaaca  
agaaccgcgaccaaactcccggctcgcacggaactagctgtccacaccggcgcgtcttataatcatcggcgttaccgccccacggagatccc  
tccgcagaatcgggagaaggactacttttctcgtctgtccgctctctgaaagaaaaccagtccttagagtcaccaagtcccgtcctaaaatgct  
cttctgctgatactggggcttaaggccgagcttattgagcagcgggcccgtctcgtgagcgtccgggcgggaaggatcaggacgctcgtcgccttc  
gtctgacgtggcagcgtcggctgaggaggggggccccggggagggcggcaaacccggcgggagggccttcgaacggCCActagc<sup>aaaa</sup>  
<sup>aa</sup>TGGAgGGGGACGGATTTCGAACCGCCGAACCCAAAGGGAGCGGATTigaAGTCCGCCGCTT  
TAGCCACTTCGCTACCCCTCC<sup>ggg</sup>GATCTGTGGTCTCATAcAGAActTATAAGATTCCCAAT  
CCAAAGACATTTACGTTTATGGTGATTTCcAGAACAcATAGCGACATGCAAAATTGCAG





TGTTCCCGCCTAGTGACACTGGGCCCGCGATTCCCTTGGAGCGGGTTGATGACGTCAGCGTTC  
GAATTCCTAGCAAAAAATGGTGGGGGAAGGATTCGAACCTTCGAAGTCTGTGACGGCAGAT  
TTgaAGTCTGCTCCCTTTGGCCGCTCGGGAACCCACCGGTGTTTCGTCCTTCCACAAGATAT  
ATAAAGCCAAGAAATCGAAATACTTTCAAGTTACGGTAAGCATATGATAGTCCATTTTAAAA  
CATAATTTTAAAACACTGCAAACACTACCCAAGAAATTATTACTTTCTACGTCACGTATTTTGTACT  
AATATCTTTGTGTTTACAGTCAAATTAATTCTAATTATCTCTCTAACAGCCTTGTATCGTATAT  
GCAAATATGAAGGAATCATGGGAAATAGGCCCTCTTCCTGCCCCGACCTAGcaaaaaaTGGAgGG  
GGACGGATTTCGAACCGCCGAACCCAAAGGGAGCGGATTtgaAGTCCGCCGCGTTTAGCCACTT  
CGCTACCCCTCCgggGATCTGTGGTCTCATAACAGAACTTATAAGATTCCCAAATCCAAAGACA  
TTTCACGTTTATGGTGAATTTCCAGAACACATAGCGACATGCAAATATTGCAGGGCGCCACT  
CCCCTGTCCCTCACAGCCATCTTCCTGCCAGGGCGCACGCGCGCTGGGTGTTCCCGCCTAGT  
GACACTGGGCCCGCGATTCCCTTGGAGCGGGTTGATGACGTCAGCGTTCGAATTCCTAGCAAA  
AAATGGTGGGGGAAGGATTCGAACCTTCGAAGTCTGTGACGGCAGATTTgaAGTCTGCTCCC  
TTTGGCCGCTCGGGAACCCACCGGTGTTTCGTCCTTCCACAAGATATATAAAGCCAAGAA  
ATCGAAATACTTTCAAGTTACGGTAAGCATATGATAGTCCATTTTAAAACATAATTTTAAAA  
CTGCAAACACTACCCAAGAAATTATTACTTTCTACGTCACGTATTTTGTACTAATATCTTTGTGT  
TTACAGTCAAATTAATTCTAATTATCTCTCTAACAGCCTTGTATCGTATATGCAAATATGAAG  
GAATCATGGGAAATAGGCCCTCTTCCTGCCCCGACctagcaaaaaTGGAgGGGGACGGATTTCGAAC  
CGCCGAACCCAAAGGGAGCGGATTtgaAGTCCGCCGCGTTTAGCCACTTCGCTACCCCTCCggg  
GATCTGTGGTCTCATAACAGAACTTATAAGATTCCCAAATCCAAAGACATTTTCACGTTTATGG  
TGATTTCCAGAACACATAGCGACATGCAAATATTGCAGGGCGCCACTCCCCTGTCCCTCAC  
AGCCATCTTCCTGCCAGGGCGCACGCGCGCTGGGTGTTCCCGCCTAGTGACACTGGGCCCGC  
GATTCCTTGGAGCGGGTTGATGACGTCAGCGTTCGAATTCCTAGCAAAAAATGGTGGGGGA  
AGGATTCGAACCTTCGAAGTCTGTGACGGCAGATTTgaAGTCTGCTCCCTTTGGCCGCTCGGG  
AACCCACCGGTGTTTCGTCCTTCCACAAGATATATAAAGCCAAGAAATCGAAATACTTTC  
AAGTTACGGTAAGCATATGATAGTCCATTTTAAAACATAATTTTAAAACACTGCAAACACTACCCA  
AGAAATTATTACTTTCTACGTCACGTATTTTGTACTAATATCTTTGTGTTTACAGTCAAATTA  
ATTCTAATTATCTCTCTAACAGCCTTGTATCGTATATGCAAATATGAAGGAATCATGGGAAA  
TAGGCCCTCTTCCTGCCCCGACCTAGcaaaaaaTGGAgGGGGACGGATTTCGAACCGCCGAACCCA  
AAGGGAGCGGATTtgaAGTCCGCCGCGTTTAGCCACTTCGCTACCCCTCCgggGATCTGTGGTCT  
TCATAACAGAACTTATAAGATTCCCAAATCCAAAGACATTTTCACGTTTATGGTGAATTTCCAG  
AACACATAGCGACATGCAAATATTGCAGGGCGCCACTCCCCTGTCCCTCACAGCCATCTTCC  
TGCCAGGGCGCACGCGCGCTGGGTGTTCCCGCCTAGTGACACTGGGCCCGCGATTCCCTTGA  
GCGGGTTGATGACGTCAGCGTTCGAATTCCTAGCAAAAAATGGTGGGGGAAGGATTCGAAC  
CTTCGAAGTCTGTGACGGCAGATTTgaAGTCTGCTCCCTTTGGCCGCTCGGGAACCCACCGG  
TGTTTCGTCCTTCCACAAGATATATAAAGCCAAGAAATCGAAATACTTTCAAGTTACGGTA  
AGCATATGATAGTCCATTTTAAAACATAATTTTAAAACACTGCAAACACTACCCAAGAAATTATTA  
CTTTCTACGTCACGTATTTTGTACTAATATCTTTGTGTTTACAGTCAAATTAATTCTAATTATC  
TCTCTAACAGCCTTGTATCGTATATGCAAATATGAAGGAATCATGGGAAATAGGCCCTCTTC  
CTGCCCGACctagtcataatcaatgtcaacgcgtatatctggcccgtacatcgcaagcagcgcgcaaacGGATCCtgcaggCTAGT  
TATTAATAGTAATCAATTACGGGGTTCATTAGTTCATAGCCCATATATGGAGTTCGCGGTTAC  
ATAACTTACGGTAAATGGCCCGCCTGGCTGACCGCCCAACGACCCCGCCATTGACGTCAA  
TAATGACGTATGTTCCCATAGTAACGCCAATAGGGACTTCCATTGACGTCAATGGGTGGAg  
TATTTACGGTAAACTGCCCACTTGGCAGTACATCAAGTGTATCATATGCCAAGTACGCCCCC

TATTGACGTCAATGACGGTAAATGGCCCGCCTGGCATTATGCCAGTACATGACCTTATGGG  
ACTTTCCTACTTGGCAGTACATCTACGTATTAGTCATCGCTATTACCATGGTCGAGGTGAGCC  
CCACGTTCTGCTTCACTCTCCCCATCTCCCCCCCCTCCCACCCCCAATTTTGTATTTATTTAT  
TTTTTAATTATTTTGTGCAGCGATGGGGGCGGGGGGGGGGGGGGGCGCGCCAGGCGGGGC  
GGGGCGGGGCGAGGGGCGGGGCGGGGCGAGGCGGAGAGGTGCGGCGGCAGCCAATCAGAG  
CGGCGCGCTCCGAAAGTTTCCTTTTATGGCGAGGCGGCGGCGGCGGCCCTATAAAAAG  
CGAAGCGCGCGGCGGGCGGGAGTCGCTGCGTTGCCCTTCGCCCCGTGCCCGCTCCGCGCCGC  
CTCGCGCCGCCCGCCCCGGTCTGACTGACCGCGTACTCCACAGGTGAGCGGGCGGGACG  
GCCCTTCTCCTCCGGGCTGTAATTAGCGCTTGGTTAATGACGGCTCGTTTCTTTTCTGTGGCT  
GCGTGAAAGCCTTAAAGGGCTCCGGGAGGGCCCTTTGTGCGGGGGGAGCGGCTCGGGGGG  
TGCGTGCCTGTGTGTGTGCGTGGGGAGCGCCGCGTGC GGCCCGCGCTGCCCGGCGGCTGTGA  
GCGCTGCGGGCGCGGCGCGGGGCTTTGTGCGCTCCGCGTGTGCGCGAGGGGAGCGCGGCCG  
GGGGCGGTGCCCGCGGTGCGGGGGGGCTGCGAGGGGAACAAAGGCTGCGTGCGGGGTGT  
GTGCGTGGGGGGGTGAGCAGGGGGTGTGGGCGCGGCGGTGCGGGCTGTAACCCCCCTGCA  
CCCCCTCCCCGAGTTGCTGAGCACGGCCCGGCTTCGGGTGCGGGGCTCCGTGCGGGGCGTG  
GCGCGGGGCTCGCCGTGCCGGGCGGGGGGTGGCGGCAGGTGGGGGTGCCGGGCGGGGCGG  
GGCCGCCTCGGGCCGGGAGGGCTCGGGGGAGGGGCGCGGCGGCCCGGAGCGCCGGCGG  
CTGTGAGGCGCGGCGAGCCGACCCATTGCCTTTTATGGTAATCGTGCGAGAGGGCGCAG  
GGACTTCTTTGTCCCAAATCTGGCGGAGCCGAAATCTGGGAGGCGCCCGCCACCCCCCTCT  
AGCGGGCGCGGGCGAAGCGGTGCGGCGCCGGCAGGAAGGAAATGGGCGGGGAGGGCCTTC  
GTGCGTCCCGCGCCCGCTCCCCTTCTCCATCTCCAGCCTCGGGGCTGCCCGAGGGGGACG  
GCTGCCTTCGGGGGGGACGGGGCAGGGCGGGGTTTCGGCTTCTGGCGTGTGACCGGCGGCTC  
TAGAGCCTCTGCTAACCATGTTTCATGCCTTCTTCTTTTTCTACAGCTCCTGGGCAACGTGCT  
GGTTaTTGTGCTGTCTCATATTTTGGCAAAGAATTGGCCAAGGAGGCCACCATGGTGAGCA  
AGGGCGAGGAGCTGTTACCGGGGTGGTGCCATCCTGGTTCGAGCTGGACGGCGACGTAA  
CGGCCACAAGTTCAGCGTGTCCGGCGAGGGCGAGGGCGATGCCACCTAgGGCAAGCTGACC  
CTGAAGTTCATCTGCACCACCGGCAAGCTGCCCGTGCCCTGGCCACCCTCGTGACCACCCT  
GACCTACGGCGTGCAGTGCTTCAGCCGCTACCCCGACCACATGAAGCAGCACGACTTCTTCA  
AGTCCGCCATGCCGAAGGCTACGTCCAGGAGCGCACCATCTTCTTCAAGGACGACGGCAA  
CTACAAGACCCGCGCCGAGGTGAAGTTCGAGGGGCGACACCCTGGTGAACCGCATCGAGCTG  
AAGGGCATCGACTTCAAGGAGGACGGCAACATCCTGGGGCACAAGCTGGAGTACA ACTACA  
ACAGCCACAACGTCTgaATCATGGCCGACAAGCAGAAGAACGGCATCAAGGTGA ACTTCAAG  
ATCCGCCACAACATCGAGGACGGCAGCGTGCAGCTCGCCGACCACTACCAGCAGAACACCC  
CCATCGGCGACGGCCCCGTGCTGCTGCCCGACAACCACTACCTGAGCACCCAGTCCGCCCTG  
AGCAAAGACCCCAACGAGAAGCGCGATCACATGGTCCTGCTGGAGTTCGTGACCGCCCGCG  
GGATCACTCTCGGCATGGACGAGCTGTACAAGGGGCCCTTCGAACAAAACTCATCTCAGA  
AGAGGATCTGAATATGCATAACGGTCATCATACCATACCATcatcaccatcaccatcatTaAggacctaa  
ggccgaattcaacgcgttaagtcgacaatcaacctctggattacaaaattgtgaagattgactggtattcttaactatgttctctttacgctatgtggata  
cgctgctttaatgcctttgtatcatgctattgctcccgtatgctttcattttctcctctgtataaatctggttgetgtctctttatgaggagtgtggcccgtg  
tcaggcaacgtggcgtggtgtgcaactgtgtttgtgacgcaacccccactggttggggcattgccaccacctgtagctcctttccgggactttcgtttcc  
cctcctattgccacggcggaactcagccgctgcttcccgtgctggacaggggctcggtgttgggcaactgacaattccgtggtgttgcggg  
gaaatcagctccttcttggctgctgcctgtgttgcacactggattctgcgaggacgctccttctgctacgtccttcggcctcaatccagcggacctc  
cttcccggcctgctgcccgtctgcccctcttccgctcttgccttcgacctcagacgagtcggatccttcttgggcccctccccgctgacttt  
aactggccagcagtggtcgatcgaCCAATGCCCTGGCTCACAAATACCACTGAGATCTTTTCCCTCTG

CCAAAAATTATGGGGACATCATGAAGCCCCTTGAGCATCTGACTTCTGGCTAATAAAGGAAA  
TTTATTTTCATTGCAATAGTGTGTTGGAATTTTTTGTGTCTCTCACTCGGAAGGACATATGGG  
AGGGCAAATCATTAAAACATCAGAAATGAGTATTTGGTTTAGAGTTTGGCAACATATGCCcA  
TATGCTGGCTGCCATGAACAAAGGTtGGCTATAAAGAGGTCATCAGTATATGAAACAGCCCC  
CTGCTGTCCATTCCCTTATTCCATAGAAAAGCCTTGACTTGAGGTTAGATTTTTTTTTATATTTTG  
TTTTGTGTTATTTTTTTCTTTAACATCCCTAAAAATTTTCTTACATGTTTTACTAGCCAGATTTT  
TCCTCCTCTCCTGACTACTCCCAGTCATAGCTGTCCCTCTTcttGCGGCCGCggtccgtatactccggaata  
ttaatagatcatggagataaataaatgataaccatctcgaataaataagtatcttactgtttcgaacagtttgaataaaaaaacataaatatccggat  
tattcataaccgtcccaccatcgggcgcgAACTCCTAAAAAACGCCACCatgaagtcctttgtactagccttttattcattggggtg  
aattgaagttcccatagttttccacacaacaaaaaggaaactggaaaaatgtctcttaattaccattattgcccgcaagtcagattaaattggcat  
aatgacttaataggcacagccttacaagtcaaatgcccagagtcacaaggctattcaagcagacggttgatgtgcatgctccaaatgggtcactact  
tgtgattccgctggtatggaccgaagtataaacacattccatccgatccttactccatctgtagaacaatgaaggaaagcattgaacaaacgaacaa  
ggaacttggctgaatccaggcttccctcctcaaagttggtgatgcaactgtgacggatgccgaagcagtgattgtccaggtgactcctcaccatgtgctg  
gttgatgaatacacaggagaatgggttgattcacagttcaacggaatgcagcaattacatgccccactgtccataactctacaacctggcattctg  
actataaggcaaaaggctatgtgattcaacctcatttccatggacatcaccttctcagaggacggagagctatcatcctgggaaaggaggcaca  
gggttcagaagtaactactttgcttatgaaactggaggcaaggcctgcaaatgcaactgcaagcattggggagtcagactcccatcaggtgctggtt  
cgagatggctgataaggatctcttctgctgagccagatccctgaatgccagaagggtcaagtatctctgctccatctcagacctcagtgatgaagct  
aattcaggacgttgagaggatctggatttccctctgccaagaacctggagcaaaatcagagcgggttccaatctcctcagtgatctcagctatctt  
gctcctaaaaaccaggaaccggtcctgctttaccataatcaatggtaccctaaaatactttgagaccagatacatcagagtcgatattgctgctccaatcc  
tctcaagaatggtcggatgatcagtggaactaccacagaaagggaactgtgggatgactgggcaccatagaagacgtggaaattggaccaatgga  
gttctgaggaccagttcaggatataagttcctttatacatgattggacatggtatgttgactccgatctcatcttagctcaaggctcaggtgtcgaacat  
cctcacattcaagacgctcttcgcaactcctgatgatgagattttttggtgatactgggctatccaaaaatccaatcagctttagaagggttggtc  
agtagttgaaaagctctattgctctttttctttatcatagggttaatcattggaactattcttggttctccgagttggtatccatcttgcattaaataaagcaca  
ccaagaaaagacagatttatacagacatagagatgaaccgacttggaagtataaaAgcttgcgagaagtactagaggatcataatcagccatacca  
cattttagaggtttacttcttataaaaaactcccacacctccccctgaacctgaaacataaaatgaatgcaattgtgtgtaactgtttattgcagcttata  
atggttacaataaagcaatagcatcacaatttcacaataaagcatttttactgcattctagttgtggttgcctcaactcaatgatcttatcatgtct  
ggatctgatcactgcttgagcctaggagatccgaaccagataagtgaaatctagtccaaactatttgcatttttaattttcgtattagcttacgacgtacac  
ccagttcccatctatttgcactctccctaaataatccttaaaaactccattccaccctcccagttccaactatttgcctcgcccacagcggggcattttct  
tctgttatgttttaatacaacatcctgccaactccatgtgacaaaccgtcatcttggctacttt

pAcBac1-UbiC-MbPylRS-8xtRNA<sub>CUA</sub><sup>Pyl</sup>: MbPylRS sequence is colored orange. U6 promoter is colored blue. tRNA<sub>CUA</sub><sup>Pyl</sup> is colored red. H1 promoter is colored magenta.

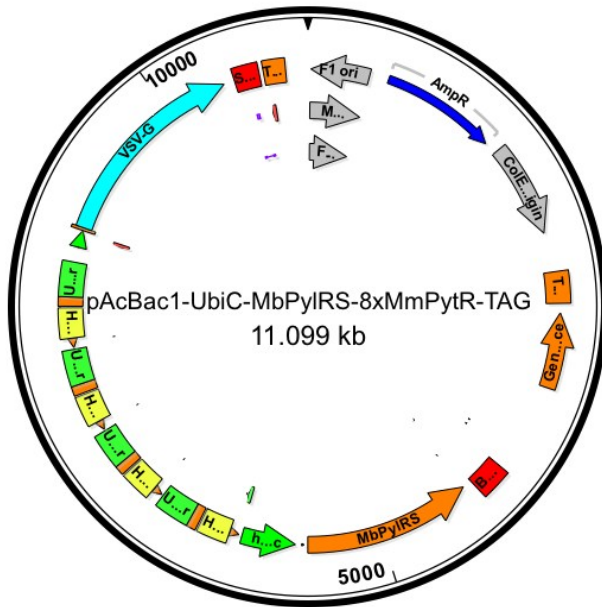

ctgaatggcgaatgggacgcgcctgtagcggcgcattaagcgcggcgggtgtgtggttacgcgcagcgtgaccgctacacttgccagcgcctag  
 cgcccgtccttctgcttctcccttcttctcgcacagctcgcggcttccccgcaagctctaaatcgggggctccccttaggggtccgatttagtgcctta  
 cggcaccctcgaccccaaaaaacttgattagggatgaggttcacgtagtgggccatcgcctgatagacgggtttcgcctttgacgttgagatccacgtc  
 ttaatagtgactctgttccaactggaacaactcaacctatctcggctattctttgattataaggattttgccgattcggcctattggttaaaaaat  
 gagctgatttaacaaaaatfaacgcgaatfttaacaaaatattaacgtttacaattcaggtggcactttcggggaatgtgcgcggaacccctattgtttat  
 tttctaaatacattcaaatatgtatccgctcatgagacaataaccctgataaatgctcaataatgaaaaaggaagatgagattcaacattccgtgt  
 cgcccttattccctttttcgggcattttgccctctgttttctcaccagaacgctggtgaaagtaaaagatgctgaagatcagttgggtgcacgagtg  
 gttacatcgaactggatctcaacagcggtaagatccttgagatgttcgcccgaagaacgtttccaatgatgagcactttaaagtctgctatgtggcgc  
 ggtattatcccgtattgacccgggcaagagcaactcggtcgccatacactattctcagaatgacttggtgagtactaccagtcacagaaaagcacc  
 ttacggatggcatgacagtaagagaattatgcagtctgccataacctgagtgataacactcggccaactacttctgacaacgatcggaggaccgaa  
 ggagcaccgctttttgcacaacatgggggatcatgtaactgccttgatcgttgggaaccggagctgaatgaagccatacacaacgacgagcgtgac  
 accacgatgcctgtagcaatggcaacaacgttcgcaaaccttataactggcgaactactactctagcttcccggcaacaatfaatagactggatggaggc  
 ggataaagtgcaggaccacttctgcgctcggccctccggctggtgttattgctgataaatctggagccggtgagcgtgggtctcgcggtatcattgc  
 agcactggggccagatggtaagccctccgctatcgtatctacacgacggggagtcaggcaactatggatgaacgaaatagacagatcgtgagat  
 aggtgcctcactgattaagcattggaactgtcagaccaagttactcatatatactttagattgattaaaacttcatttttaattaaaaggatctaggtgaagat  
 ctttttgataatctcatgacaaaatccctaacgtgagtttctccactgagcgtcagaccccgtagaaaagatcaaaggatcttcttgatcctttttc  
 tgcgctaactctgctgcttcaacaaaaaaaccaccctaccagcgggtgttgttccggatcaagagctaccaactcttttccgaaggtaactggctt  
 cagcagagcgcagatacacaactgtccttctagtgtagccgtagttagccaccactcaagaactctgtagaccgcctacatacctcgtctgctaat  
 cctgttaccagtggtctgctgccagtggcgataagctgtcttaccgggttgactcaagacgatagttaccggataaggcgcagcggctcgggctgaac  
 ggggggtctgacacagcccagcttgagcgaacgacctacaccgaactgagatacctacagcgtgagcattgagaaagcgcacgctcccga  
 gggagaaaggcggacaggtatccggtaagcggcagggctcgaacagagagcgcacgagggagctccaggggaaacgcttgatctttatag  
 cctgtcgggttccacctctgacttgagcgtcattttgtgatgctcgtcagggggcggagcctatggaaaaacgccagcaacgcggccttttacg  
 gttctgaccttttctgacctttgctcacatgtcttctcgtctatccctgattctgtggataaccgtattaccgctttgagtgagctgataccgctcgc  
 gcagccgaacgaccgagcgcagcagtcagtgagcaggaagcgggaagagcgcctgatcgggtattttctcttaccgatctgtcgggtatttcacacc

gcagaccagccgcgtaacctggcaaaatcggttacggtgagtaataaatggatgccctgcgtaagcgggtgtggcggaacaataaagtcttaaactga  
acaaaatagatctaaactatgacaataaagtcttaaactagacagaatagttgtaaactgaaatcagtcagttatgctgtgaaaaagcactactggactttgt  
tatggctaaagcaaaactcttattttctgaagtgcaaattgccgctgtattaaagagggggcgtggccaagggcatgtaaaagactatattcgcggcgtgt  
gacaattfaccgaacaactccgcggcgggaagccgatctcggctgaacgaattgtaggtggcggtacttgggtcगतatcaaaagtcatcacttctc  
ccgtatgcccactttgtatagagagccactgcgggctcgtcaccgtaactctgctgcacgtagatcacataagcaccgaagcgcgttggcctcatgctga  
ggagattgatgagcgcgggtggcaatgcctgcctccggtgctcgggagactgcgagatcatagatagatctcactacgcggctgctcaaacctgg  
gcagaacgtaagccgcgagagcgcacaaccgctcttggctgaaggcagcaagcgcgatgaatgttactacggagcaagttcccaggaatcg  
gagtcggctgatgtgggagtaggtggctactcctcgaactcagaccgaaaagatcaagagcagcccgcattgacttggctcagggccgag  
cctacatgtgcaatgatcccactactgaccacctaactttgttttagggcgactgccctgctgcgtaacatcgttgcctgctgcgtaacatcgttgcctc  
cataacatcaaacatgaccacggcgtaacgcgttgccttggatgccgagggcatagactgtacaaaaaacgctacataacaagccatgaaaacc  
gccactgcgcgttaccaccgctgcgttcggtaaggttctggaccagtgcgtgagcgcatacgtacttgcattacgtttacgaaccgaacaggctta  
tgtcaactgggttcgtcctcatccgtttccacgggtgctgcctcaccggcaaccttggcagcagcgaagtcgaggcatttctgctcgtgctggcgaacg  
agcgaaggttccgctccacgcatcgcaggcattggcgcccttgccttctctacggcaaggtgctgctgcacggatctgccctggctcaggagatc  
ggtagacctcggcgtcgcggcgttccgggtggtgctgaccccgatgaagtggctcgcacctcggtttctggaaggcgagcatcgttctgccc  
aggactctagctatagttctagtggttgctacgtaccgtagtgctatggcagggttgcgttaatgcgccgtacaggcgcgtgggataccccct  
agagccccagctggttcttccgctcagaagccatagaccaccgcatcccagcatgcctgctattgtcttccaatcctcccccttgcctgctcctgccc  
caccaccccccagaatagaatgacacctactagacaatgcgatgcaatttctcattttattaggaaggacagtgaggagtgccacttccagggtca  
aggaaggcacgggggaggggcaacaacagatggctggcaactagaaggcacagtcagggtgatcagcgggttaaacgggcccctctagactgc  
agttaaagtcgacttaacgcgttgaattcTTACAGATTGGTTGAAATCCCATTATAGTAAGATTCCGACCTTGA  
TGCCCTCTAATGTTTTAAAGCCGTGCATAACCTTGAGCAAGCGTTCAAGACCAAAACCTG  
CACCTATCCATGGTTTGTCAATACCCATTCTCTATCAAGAGAACTGGCCCGACGACTGCC  
GAAGAAAGCTCCAGGTCCCCGTGCATTATATCAAGAGTATCCCCAaAGACCATACAGGAATC  
TCCTACGATTTTCGAAGTCGATTTCCAGATAGTCCAGAACTCTTTGATGAGAGCTTCAAGAT  
TTTCCCGAGTACATCCCGAACCCTCTGACAGAAGTTCACCATAGTAAATTCTTCCAGGTGC  
TCTTTGCCGTCAGACTCTTTCCGGTAACAAGGTCCGACTTCGAAAATTTTTATTGGGCCTGGT  
AAAATCCTATCGAGTTTTTCGAGATAGTTGTAAAGAGTCGGGGCAAGCATTGGCCTCAAGCA  
GAGATTTTTATCCACCCGGAAGATCTGTTTTGAAAGTTCAGTATCATTATTAATACCCATTCT  
CTCCACGTATTTCCGCCGGAATAAGGATAGGAGACTTTATCTCCAGAAAACCCCGGTCTACGA  
AAAATTTTCGTAATATCACGTTTCGAGTTTACCGAGGTAGTCTTCTCTATCATTGGTATAGAGCC  
GCTGAAAATCGTTTTTTCTTCTTGTACAAGTTCAGGCTCAAGTTCCCTGAAAGGCTTTGCCA  
TATTTAGAGAAATTTATCCTCTGGACTTAAGAGAGCCTCAACCCTATCAAGCTGGCTTCTTG  
TAAGTGAAGGAGCAGGAGCCGATGCGGGAACAGACGAATTTGGAGTTGATTTTGCAGGCCA  
AGGTACAGATCTGGATGTGTTGTTGATGCCTTTGCAGAAACAGAATTTTCCAGAGGCTTCG  
GAGCCCTTGAAACTGATTTCCGCATAGCTTTTTTGACCTTTGGAGCAGAACTACCCTAACTT  
TCACACTGTTTTTGCTTTCGGTTGATCTTGTGAGAAAATTTATTGATATCCTCGTCCGAAACCC  
TACATCGTTTGCAGGTTTTTCTGACTTATGATGTCTGAATGCTCTGGCTGTTCTACAACCTCT  
GGAATTATTCACAACAAGATGGTCTCCACACGCCATTTCAATGTATATTTACTTCTTGAGAC  
CTCATGGTGCTTGATTTTGTGGAGCGTGCCAGTCTTGACATCCAGAGCCCGGTTCGAGATA  
TTAAAACATCTAATGGTTTTTTATCCATggtggcgtagccagcttgggtctccctatagtgagtcgtattaatttcgataagcca  
gtaagcagtggttctctagttagccagagagctCtagaccaagtgacgatcacagcgtaccacaacaagaaccgcgacccaaatcccggctgcga  
cggaactagctgtgccacaccggcgcgtccttataatcatcggcgttaccgccccacggagatccctccgcagaatcccgagaagggactactt  
ttcctcgcctgttccgctctctgaaagaaaaccagtgccctagatcaccgaagtcctcctctgctgatactggggttcaaggccga  
gtcttatgagcagcgggcccgtctctgagcgtccggcggaaggatcaggacgctcgtcgccttctgctgacgtggcagcgtcgcctgagg  
agggggcgcccgcgggagggcgcacaaccggcgaggccttcaacggCCActagcAAAAACGGAAACCCCGGGA

ATCTAACCCGGCTGAACGGATTTAGAGTCCGTTTCGATCTACATGATCAGGTTTCCGGGGATC  
TGTGGTCTCATAACAGAACTTATAAGATTCCCAAATCCAAAGACATTTACGTTTATGGTGATT  
TCCCAGAACACATAGCGACATGCAAATATTGCAGGGCGCCACTCCCCTGTCCCTCACAGCCA  
TCTTCCTGCCAGGGCGCACGCGCGCTGGGTGTTCCCGCCTAGTGACACTGGGCCCCGCGATT  
CTTGAGCGGGTTGATGACGTCAGCGTTCGAATTCCTAGCAAAAAACGGAAACCCCGGGAA  
TCTAACCCGGCTGAACGGATTTAGAGTCCGTTTCGATCTACATGATCAGGTTTCCGGTGTTCG  
TCCTTCCACAAGATATATAAAGCCAAGAAATCGAAATACTTTCAAGTTACGGTAAGCATAT  
GATAGTCCATTTTAAAACATAATTTTAAAACACTGCAAACACTACCCAAGAAATTATTACTTTCTAC  
GTCACGATTTTGTACTAATATCTTTGTGTTTACAGTCAAATTAATTCTAATTATCTCTCTAAC  
AGCCTTGTATCGTATATGCAAATATGAAGGAATCATGGGAAATAGGCCCTCTTCCTGCCCCG  
CctagcAAAAACGGAAACCCCGGGAATCTAACCCGGCTGAACGGATTTAGAGTCCGTTTCGAT  
CTACATGATCAGGTTTCCGGGGATCTGTGGTCTCATAACAGAACTTATAAGATTCCCAAATCC  
AAAGACATTTACGTTTATGGTGATTTCCCAGAACACATAGCGACATGCAAATATTGCAGGG  
CGCCACTCCCCTGTCCCTCACAGCCATCTTCCTGCCAGGGCGCACGCGCGCTGGGTGTTCCC  
GCCTAGTGACACTGGGCCCCGCGATTCTTGAGCGGGTTGATGACGTCAGCGTTCGAATTC  
TAGCAAAAAACGGAAACCCCGGGAATCTAACCCGGCTGAACGGATTTAGAGTCCGTTTCGAT  
CTACATGATCAGGTTTCCGGTGTTCGTCCTTCCACAAGATATATAAAGCCAAGAAATCGA  
AACTTTCAAGTTACGGTAAGCATATGATAGTCCATTTTAAAACATAATTTTAAAACACTGCA  
AACTACCCAAGAAATTATTACTTTCTACGTCACGATTTTGTACTAATATCTTTGTGTTTACA  
GTCAAATTAATTCTAATTATCTCTCTAACAGCCTTGTATCGTATATGCAAATATGAAGGAATC  
ATGGGAAATAGGCCCTCTTCCTGCCCCGACctagcAAAAACGGAAACCCCGGGAATCTAACCC  
GGCTGAACGGATTTAGAGTCCGTTTCGATCTACATGATCAGGTTTCCGGGGATCTGTGGTCTC  
ATACAGAACTTATAAGATTCCCAAATCCAAAGACATTTACGTTTATGGTGATTTCCCAGAA  
CACATAGCGACATGCAAATATTGCAGGGCGCCACTCCCCTGTCCCTCACAGCCATCTTCCTG  
CCAGGGCGCACGCGCGCTGGGTGTTCCCGCCTAGTGACACTGGGCCCCGCGATTCTTGAGC  
GGTGTGATGACGTCAGCGTTCGAATTCCTAGCAAAAAACGGAAACCCCGGGAATCTAACCC  
GGCTGAACGGATTTAGAGTCCGTTTCGATCTACATGATCAGGTTTCCGGTGTTCGTCCTTTCC  
ACAAGATATATAAAGCCAAGAAATCGAAATACTTTCAAGTTACGGTAAGCATATGATAGTC  
CATTTTAAAACATAATTTTAAAACACTGCAAACACTACCCAAGAAATTATTACTTTCTACGTCACGT  
ATTTTGTACTAATATCTTTGTGTTTACAGTCAAATTAATTCTAATTATCTCTCTAACAGCCTTG  
TATCGTATATGCAAATATGAAGGAATCATGGGAAATAGGCCCTCTTCCTGCCCCGACctagcAAA  
AACGGAAACCCCGGGAATCTAACCCGGCTGAACGGATTTAGAGTCCGTTTCGATCTACATG  
ATCAGGTTTCCGGGGATCTGTGGTCTCATAACAGAACTTATAAGATTCCCAAATCCAAAGACA  
TTTACGTTTATGGTGATTTCCCAGAACACATAGCGACATGCAAATATTGCAGGGCGCCACT  
CCCCTGTCCCTCACAGCCATCTTCCTGCCAGGGCGCACGCGCGCTGGGTGTTCCCGCCTAGT  
GACACTGGGCCCCGCGATTCTTGAGCGGGTTGATGACGTCAGCGTTCGAATTCCTAGCAAAA  
AACGGAAACCCCGGGAATCTAACCCGGCTGAACGGATTTAGAGTCCGTTTCGATCTACATG  
ATCAGGTTTCCGGTGTTCGTCCTTCCACAAGATATATAAAGCCAAGAAATCGAAATACTT  
TCAAGTTACGGTAAGCATATGATAGTCCATTTTAAAACATAATTTTAAAACACTGCAAACACTACC  
CAAGAAATTATTACTTTCTACGTCACGATTTTGTACTAATATCTTTGTGTTTACAGTCAAAT  
TAATTCTAATTATCTCTCTAACAGCCTTGTATCGTATATGCAAATATGAAGGAATCATGGGA  
AATAGGCCCTCTTCCTGCCCCGACctagtcaataatcaatgcaacgcgtatatctggcccgtacatcggaagcagcgcaaaacG  
GATCCtgcaggtatttGCGGCCGcggtccgtatactccggaatattaatagatcatggagataaftaaatgataaccatctcgcaataataa  
gtattttactgtttcgtaacagttttgtaataaaaaaacctataaatattccggattattcataccgtcccaccatcgggcgcgAACTCCTAAAAA

ACCGCCACCatgaagtcctttgtacttagcctttttattcattggggtgaattgcaagtcacatagttttccacacaacccaaaaaggaaactgga  
aaaatgttccttctaattaccattattgcccgcaagctcagatftaaattggcataatgacttaataggcacagcctfacaagtcaaaatgcccaagagtcac  
aaggctattcaagcagacgggtggatgtgtcatgcttccaaatgggtcactactgtgattccgctggtatggaccgaagtataacacattccatccgatc  
cttactccatctgtagaacaatgcaaggaaagcattgaacaaacgaaacaaggaacttggtgaatccaggcttccctcctcaaaagtgtggatatgcaa  
ctgtgacggatgccgaagcagtgattgtccaggtgactcctaccatgtgctggtgatgaatacacaggagaatgggttgattcacagttcatcaacgga  
aaatgcagcaattacatatgcccactgtccataactctacaacctggcattctgactataaggtcaaagggtatgtgattctaacctcatttccatggacat  
caccttctctcagaggacggagagctatcctcctgggaaaggaggcacagggttcagaagtaactactttgcttatgaaactggaggcaaggcctgc  
aaaatgcaactgcaagcattggggagtcagactcccacaggtgctggttcgagatggctgataaggatctttgtcgcagccagattccctgaatgc  
ccagaagggtcaagtatctctgctccatctcagacctcagtggtatgtaagttaattcaggacgttgagaggatcttgattatccctctgccaagaaacct  
ggagcaaaatcagagcgggtctccaatctctccagtggtatcagctatctgtcctaaaaaccagggaaccggctcctgttccacataatcaatggta  
ccataaaactttgagaccagatacatcagagtcgatattgctgctccaatcctctcaagaatggcggatgatcagtggaactaccacagaaaggga  
ctgtgggatgactgggcacatataagacgtggaattggaccaatggagttctgaggaccagttcaggatataagttcctttatacatgattggacat  
ggtatgttgactccgatcttcatcttagctcaaaaggctcaggtgttcgaacatcctcacattcaagacgctgcttcgcaacttctgatgatgagagttat  
ttggtgatactgggctatccaaaaatccaatcagcctttagaagggtggttcagtagttggaaaagctctattgcctctttttctttatcatagggttaact  
ggactattctgttctccgagttggtatccatctttgcattaaatgaagcacaccaagaaaagacagattatacagacatagagatgaaccgactggaa  
agtataaggccaggccggccaagctgtcagagaagtactagaggatcataatcagccataccacattgtagaggtttactgctttaaaaaacctcca  
cacctccccctgaacctgaaacataaaatgaatgcaattgttgttgaactgtttattgcagcttataatggttacaataaagcaatagcatcacaattca  
caataaagcatttttctactgattctagtgtggtttgccaactcatcaatgtatcttatcatgtctggatctgatcactgcttgagcctaggagatccgaa  
ccagataagtgaatctagtccaactatttgcatttttaatttctgattagcttacgacgtacaccagttccatctattttgactcttccctaaataatc  
cttaaaaaactccattccaccctcccagttccaactatttgcgccacagcggggcattttctctctgttatgttttaatacaaacatcctgccaactcca  
tgtgacaaaccgtcatcttcggctacttttctctgtcacagaatgaaaattttctgtcatctctcgttattaatgtttgtaattgactgaatatcaacgcttattgc  
agc



pAcBac3-EcLeu<sub>TAG</sub>-EGFP<sup>\*\*</sup>: *EcLeuRS-AK1* is colored orange. EGFP<sup>\*\*</sup> is colored green.  
 tRNA<sub>CUA</sub><sup>EcLeu</sup> is colored red. H1 promoter is colored magenta.

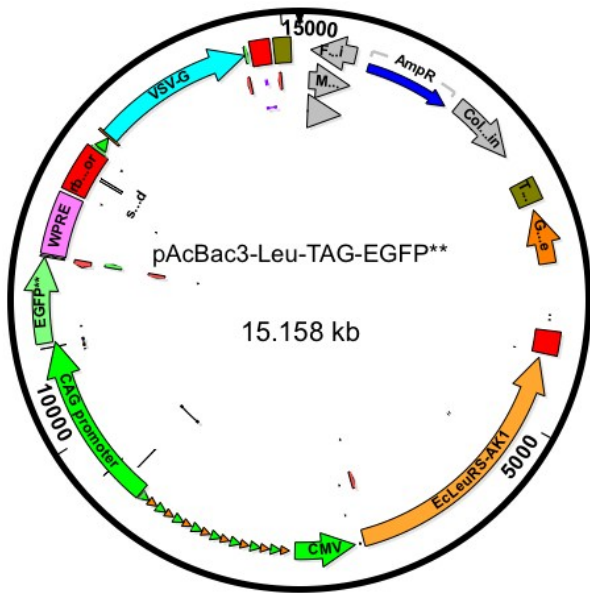

ttctctgtcacagaatgaaaatctctgtcatctctcgttataatgttgtaattgactgaatatcaacgcttatttgcagcctgaatggcgaatgggacgcgc  
 cctgtagcggcgcatlaagcgcggcgggtgtggtgttacgcgcagcgtgaccgctacacttgcagcgccttagcggcctcttccgtttctccct  
 tcttctcgcacgttcgcggcttccccgtcaagctctaaatcggggctcccttaggggtccgatttagtgccttacggcacctcgaccccaaaaaact  
 tgattagggtgatggttcacgtagtgggccatcgccctgatagacggttttcgcctttgacgttgagtcacgttcttaatagtgactctgttcaaac  
 tggaaacactcaaccctatctcggctattctttgattataaggatttccgatttcggcctattggttaaaaaatgagctgatttaacaaaaatfaacg  
 cgaatttaacaaaatattaacgtttacaattcaggtggcactttcggggaatgtgcgcggaaccctatttgttttttctaaatacattcaaatatgatac  
 cgctcatgagacaataaccctgataaatgctcaataatattgaaaaggaagagtatgattcaacattccgtgtcgccttattccctttttcgggcatt  
 ttgcttctctgttttctcaccagaaacgtggtgaaagtaaagatgctgaagatcagttgggtgcacgagtggttacatgaactggatctcaacag  
 cgtaagatccttgagagtttgcggcgaagaacgtttccaatgatgagcactttaaagtctgctatgtggcgcggtattatcccgtattgacgccgggc  
 aagagcaactcggctcggcgcatacactattctcagaatgacttgggtgagtactaccagtcacagaaaagcatcttacggatggcatgacagtaagaga  
 attatgagtgctgccataaccatgagtgataacactgcggccaacttactctgacaacgatcggaggaccgaaggactaacggctttttgcacaacat  
 ggggatcatgtaactgccttgatcgttgggaaccggagctgaatgaaccatacacaacgacgagcgtgacaccacgatgctgtagcaatggcaa  
 caacgttgcgcaaacatfaactggcgaactacttactctagcttccggcacaataatagactggatggaggcggataaagtgcaggaccacttctg  
 cgctcggccctccggctggctgtttattgctgataaatcggagccggtgagcgtgggtctcgcggtatcattgcagcactggggccagatgtaagc  
 ctcccgtatcgtatctacacgacggggagtcaggcaactatggatgaacgaatatagacagatcgtgagataggtgcctcactgattaagcattgg  
 taactgtcagaccaagttactcataatacttagattgattaaaactcattttaatttaaaaggatctaggtgaagatccttttgataatctcatgacaaaa  
 tcccttaacgtgagtttctccactgagcgtcagaccccgtagaaaagatcaaaggatctcttgagatcctttttctgcgcgtaactctgctgtgcaaa  
 caaaaaaccaccctaccagcgggtggtttgttccggatcaagagctaccaactcttttccgaaggtaactggcttcagcagagcgcagatacacaat  
 actgtccttctagtgtagccgtagttaggccaccactcaagaactctgtagcaccgcctacatacctcgtctgtaacctgttaccagtggctgctgcca  
 gtggcgataagtcgtgtcttacccgggttgactcaagacgatagttaccggataaggcgcagcggctgggctgaacggggggtctgtcacacagccc  
 agcttgagcgaacgacctacaccgaactgagatacctacagcgtgagcattgagaagcgcacgcttcccgaaggagaaaaggcggacaggtac  
 cgtaagcggcagggtcggaacaggagagcgcacgagggagctccagggggaacgcctggtatcttatagtcctgtcgggtttccgacctctga  
 ctgagcgtcgattttgtgatgctcgtcagggggcggagcctatgaaaaacccagcaacgcggccttttacggttctggccttttctggcctttt  
 ctcacatgttcttctcgttatcccctgattctgtgataaccgtattaccgctttagtgagctgataccgctcggcgcagccgaacgaccgagcga  
 gcgagtcagtgagcaggaagcgggaagagcgcctgatcgggtatttctctfacgcatctgtcgggtatttcacaccgacagaccgcgctaaccgt

gcaaaatcggttacgggtgagtaataaatggatgccctgcgtaagcgggtgtggggcggacaataaagtcttaactgaacaaaatagatctaaactatgac  
aataaagtcttaactagacagaatagttgtaactgaaatcagtcaggttatgctgtgaaaaagcatactggactttgttatggctaaagcaactcttcatt  
ttctgaagtcaaatgccctgctatfaaagagggcgctggccaagggcatggtaagactatattcggcgcttgtagacaatftaccgaacaactccgc  
ggccgggaagccgatctcggctgaacgaattgtaggtggcgacttgggtcgcatacaaaagtgcacacttctcccgtatgccaactttgtatagag  
agccactcgggatcgtcaccgtaactgctgtcacgtagatcacataagcacaagcgcgtggcctcatgcttgaggagattgatgagcgcggtggc  
aatgccctgcctccgggtgctcgggagactcgcgagatcatagatagatctactacgcggctgctcaaacctgggcagaacgtaagccgagagag  
cgccaacaaccgcttcttggctgaaggcagcaagcgcgatgaatgtctactacggcaagttcccaggtaatcggagtcggctgatgtgggagt  
agggtggctacgtctccgaactcacgaccgaaaagatcaagagcagcccgatgattgacttggctcagggccgagcctacatgtcgaatgatccca  
tacttgagccactaactttgtttaggcgactgcctgctgcgtaacatcgttctgctgcgtaacatcgttctgctccataacatcaaacatcgaccac  
ggcgtaacgcgcttctgcttggatgcccaggcatagactgtcaaaaaaacgctatacaagccatgaaaaccgcaactcgccttaccaccgct  
gcttcggtaaggttctggaccagtgcgtgagcgcatacgtacttcattacagtttcaaacgcaagcgttatgtaactgggttctgctccttcatc  
cgttccacgggtgctcaccggcaacctgggcagcagcgaagtcgaggcatttctgctcgtgctggcgaacgagcgaaggttctgctccacg  
catcgtcaggcattggcgccctgctgttctctacggcaaggtgctgacggatctccctggctcaggagatcggtagacctcggcctcgcggc  
gcttccgggtgctgaccccgatgaagtggtcgcacctcctggtttctggaagcgcgagcatcgttctgcccaggactctagctatagtctatg  
gttggcctacgtaccgtagtggctatggcagggcttgccttaatgcgcgctacagggcgcgtggggataccccctagagccccagctgttcttcc  
gcctcagaagccatagagcccaccgcatcccagcatcctgctattgtctccaatcctccccttgcctgctcctgccccccccccccagaataga  
atgacacctactcagacaatgcgatgcaatttctcattttattaggaaaggacagtgaggagtgccaccttcagggtcaaggaaggcacgggggagg  
gcaacaacagatggctggaactagaaggcacagtcgaggtgatcagcgggttaaacgggccccttagactcgaattcAATTCttaaaccgggc  
ccccaacgaccagattgaggagttacctggtacgtaaatcactttacgtacagtaacgccatcaagatatttctaccagatgttcttggccagcacgtt  
cgcgaacctgttctccgttgcctcaccgggaacgggtatttggcacggactttaccgttaacctgcaccacgaccagcgtggagtcttccaccatcgtt  
ttcgtcagcaaccggccacggcgcgttctcgcatacgccttgccttccagttctccacagcgtgaagcagatgtcgggggtgaacgggttaagcata  
cggacaacggccagcagtgcttctcgtcatcagagcgcgatcctgctcgcctcaggttgggttcttccaggttctcagatcgcataatcgcgcaatt  
ggcgtgtgaaggtctgacagcggccgatacctcgtcactttagcagatcgtttatgcacatcgcgacgcagcgttcttctgatttctagtcagcgcataca  
cgttcagtgcccaacatcaccttttctgctgctcgtaaaccagttccagacacgttccaggaagcgggttagcccctccacaccggattcctgccattc  
gagagtcatacagccggagaagcaaacatcataaacagacgaacgggtgtccgcgccaacgttcaaccatcactcgcgggtcagatccgttcttcc  
gacttggacatttctcagcgggtataaacagttcatggcctgcgcacatcttctcgttccagatcggccttctcgtcacgttcaacgatagcatcaac  
cggggaaaccagttacgttccgggttctcccaacatagtagaaggcatctgccagccataccctgacacagcaactgttctcgtggttctcagat  
tccatgcctgcatcacgcatcagtttgggaagaagcgggaagtagagcagaCCcataatggcgttcaataaccaccaataAGgataccaccgg  
cagccagtagttagccgctcggaatccagcataccttcttctgactcgggcaaggttagcgcgcataGGAaccaggaggactccataaaggtgctga  
aagtgctcgtttcacgcagtgctggcataaccgttaacggtagtttcccccactccggatctgctttaatcgggtggtaatgcccctaccacatctcc  
ggcaggatcaccggcagctgctcgggggtcggcattaccgtaccgttcttagagtcaccatcggatcggcgcgccccagtaacgctgacggga  
aacacccagtcgcgcagccgtagttcactttacgtcgcacaacgccatcgcagtcagttatcggcagtgccgttgaaggccgcttcatgtcaaga  
ccgttgaactgccagagttgaacagcacgccttttctcagtcagggttctgtagaaaagatctggctcagagccgtcagctgccaggataaccggttctg  
gttcagccgctatttagaggcaaacctcgtagtcgcgctggtcgtccccgggtaccgccataactcgcgccgtgcccgtactccatcaatacgaagtttctg  
ccaaaacgggaatttctcggcgttaatgggtgaaccgctttaaagccagatcgcagccttttctccatcgtcgcatttctcagctcggcaacttgggt  
tacggcattcgtcaataaaggccgccagttcaggattatttccggccttctcgcagcggatgaccgcagctaccgccaggttaggtacaaccata  
aaACGgtccggggcgggtagttaaaccggtcagcgtgttctatagtcgtaaacgttgaaggtgatctccacgccttccggaacgaccgatccagttacgc  
tgcaggttttaacgggtctcggcagtgatccagttatccagatcgttagcagctcgtcagcgtaaagcagtgatttataaaccactcgggactcttt  
acgttcaactttggtatcgcagcggcagcagccgtcagataactgttcttccagttacggctgtcgttccgacaccagttgaccgagaagttctt  
cttatataaccaggccttttatacagctcggtaagaatttctgttcccaacggtagtattccggcgtacaggttccagctcgcggctccagtcataccaa  
agcccagcattttagctggttttcatatcgcgatgttctgtacgtccacgggtccggagcgggtgttggtttaccggcgccttccgaggcagacc  
aaacgcgtcccagccgatcggctgcaggacgttttccagcatacgtggttagcggggcagatcacgtcaccgatggtgtagttacgtacgtgcccac  
gtgtagtcgaccagaaggataggagagacagacaggcagtaatacttcttctcgtctcgttccggttacttcaaatgtcgccttctTatcccaatgaag  
ctgtactttggattctatcttccgggcgggtattgtcttccatGgTGGCgctagccagcttgggtctccctatagtgagtcgtataatttcgataagcca

gtaagcagtggggtctctagttagccagagagctctgcttatatagacctcccaccgtacacgcctaccgccatttgcgtcaatggggcggagttgtaacg  
acatttggaaagtcccgttgatttgggtgcaaaaactcccattgacgtcaatgggggtggagacttggaaatccccgtgagcaaacgctatccacg  
cccattgatgtactgcaaaaaccgcatccatggaatagcgtgactaatacgtagatgtactgccaagtaggaaagccataaggtcatgtactggg  
cataatgccaggcgggccatttaccgtcattgacgtcaatagggggcgtacttggcatatgatacacttgatgtactgccaagtgggcagtttaccgtaaat  
agtccaccattgacgtcaatggaagtcctattggcgttactatgggaacatacgtcattattgacgtcaatggggcggggcgttggggcggcagcca  
ggcggggccatttaccgtaagtatgtaacgcggaactccatataatgggetatgaactaatgaccccgtaattgattactattaataactagcaataatcaatg  
tcaacgcgtatatctggcccgtacatcggaagcagcgcaaacGGATCCAAAAATACCCGGAGCGGGACTTGAACC  
CGCACAGCGCGAACGCCGAGGGATTTAGAATCCCTTGTGTCTACCGATTCCACCATCCGGGC  
GGTGTCTCTATCACTGATAGGGAAGTTATAAGTCTCTATCACTGATAGGGATTTACGTTTAT  
GGTGATTTCCAGAACACATAGCGACATGCAAATATTAGATCCAAAAATACCCGGAGCGG  
GACTTGAACCCGCACAGCGCGAACGCCGAGGGATTTAGAATCCCTTGTGTCTACCGATTCCA  
CCATCCGGGCGGTGTCTCTATCACTGATAGGGAAGTTATAAGTCTCTATCACTGATAGGGAT  
TTCACGTTTATGGTGATTTCCAGAACACATAGCGACATGCAAATATTAGATCCAAAAATA  
CCCGGAGCGGGACTTGAACCCGCACAGCGCGAACGCCGAGGGATTTAGAATCCCTTGTGTCT  
ACCGATTCCACCATCCGGGCGGTGTCTCTATCACTGATAGGGAAGTTATAAGTCTCTATCACT  
GATAGGGATTTACGTTTATGGTGATTTCCAGAACACATAGCGACATGCAAATATTAGATC  
CAAAAAATACCCGGAGCGGGACTTGAACCCGCACAGCGCGAACGCCGAGGGATTTAGAATC  
CCTTGTGTCTACCGATTCCACCATCCGGGCGGTGTCTCTATCACTGATAGGGAAGTTATAAGT  
CTCTATCACTGATAGGGATTTACGTTTATGGTGATTTCCAGAACACATAGCGACATGCAA  
ATATTAGATCCAAAAATACCCGGAGCGGGACTTGAACCCGCACAGCGCGAACGCCGAGGG  
ATTTAGAATCCCTTGTGTCTACCGATTCCACCATCCGGGCGGTGTCTCTATCACTGATAGGGA  
ACTTATAAGTCTCTATCACTGATAGGGATTTACGTTTATGGTGATTTCCAGAACACATAGC  
GACATGCAAATATTAGATCCAAAAATACCCGGAGCGGGACTTGAACCCGCACAGCGCGAA  
CGCCGAGGGATTTAGAATCCCTTGTGTCTACCGATTCCACCATCCGGGCGGTGTCTCTATCAC  
TGATAGGGAAGTTATAAGTCTCTATCACTGATAGGGATTTACGTTTATGGTGATTTCCAGA  
ACACATAGCGACATGCAAATATTAGATCCAAAAATACCCGGAGCGGGACTTGAACCCGCA  
CAGCGCGAACGCCGAGGGATTTAGAATCCCTTGTGTCTACCGATTCCACCATCCGGGCGGTG  
TCTCTATCACTGATAGGGAAGTTATAAGTCTCTATCACTGATAGGGATTTACGTTTATGGTG  
ATTTCCAGAACACATAGCGACATGCAAATATTAGATCCAAAAATACCCGGAGCGGGACT  
TGAACCCGCACAGCGCGAACGCCGAGGGATTTAGAATCCCTTGTGTCTACCGATTCCACCAT  
CCGGGCGGTGTCTCTATCACTGATAGGGAAGTTATAAGTCTCTATCACTGATAGGGATTTCA  
CGTTTATGGTGATTTCCAGAACACATAGCGACATGCAAATATTAGATCCtgcaggCTAGTTATT  
AATAGTAATCAATTACGGGGTCATTAGTTCATAGCCCATATATGGAGTTCGCGTTACATAA  
CTTACGGTAAATGGCCCGCCTGGCTGACCGCCAACGACCCCCGCCATTGACGTCAATAAT  
GACGTATGTTCCCATAGTAACGCCAATAGGGACTTCCATTGACGTCAATGGGTGGAgtATTT  
ACGGTAAACTGCCACTTGGCAGTACATCAAGTGTATCATATGCCAAGTACGCCCCCTATTG  
ACGTCAATGACGGTAAATGGCCCGCCTGGCATTATGCCAGTACATGACCTTATGGGACTTT  
CCTACTTGGCAGTACATCTACGTATTAGTCATCGCTATTACCATGGTCGAGGTGAGCCCCAC  
GTTCTGCTTCACTCTCCCCATCTCCCCCCCCCTCCCCACCCCAATTTTGTATTTATTTATTTT  
AATTATTTTGTGCAGCGATGGGGCGGGGGGGGGGGGGGGCGCGGCCAGGCGGGGGCGGGG  
CGGGGCGAGGGGCGGGGCGGGGCGAGGCGGAGAGGTGCGGCGGCAGCCAATCAGAGCGGC  
GCGCTCCGAAAGTTTCCTTTTATGGCGAGGCGGCGGCGGCGGCCCTATAAAAAGCGAA  
GCGCGCGGCGGGGCGGAGTCGCTGCGTTGCCTTCGCCCCGTGCCCGCTCCGCGCCGCCTCG  
CGCCGCCCGCCCCGGCTCTGACTGACCGCGTTACTCCACAGGTGAGCGGGCGGGACGGCCC

TTCTCCTCCGGGCTGTAATTAGCGCTTGGTTTAATGACGGCTCGTTTCTTTTCTGTGGCTGCGT  
GAAAGCCTTAAAGGGCTCCGGGAGGGCCCTTTGTGCGGGGGGAGCGGCTCGGGGGGTGCG  
TGCGTGTGTGTGTGCGTGGGAGCGCCGCGTGC GGCCCGCGCTGCCCGCGGCTGTGAGCGC  
TGCGGGCGCGGGCGCGGGGCTTTGTGCGCTCCGCGTGTGCGCGAGGGGAGCGCGGCCGGGG  
CGGTGCCCCGCGGTGCGGGGGGGCTGCGAGGGGAACAAAGGCTGCGTGC GGGGTGTGTGCG  
TGGGGGGGTGAGCAGGGGGTGTGGGCGCGGCGGTCGGGCTGTAACCCCCCTGCACCCCC  
CTCCCCGAGTTGCTGAGCACGGCCCCGGCTTCGGGTGCGGGGCTCCGTGCGGGGCGTGCGCG  
GGGCTCGCCGTGCCGGGCGGGGGTGGCGGCAGGTGGGGGTGCCGGGCGGGGCGGGGCCG  
CCTCGGGCCGGGGAGGGCTCGGGGGAGGGGCGCGGCGGCCCCCGAGCGCCGGCGGCTGTGC  
AGGCGCGGCGAGCCGACCCATTGCCTTTTATGGTAATCGTGCAGAGGGCGCAGGGACTT  
CCTTTGTCCAAATCTGGCGGAGCCGAAATCTGGGAGGCGCCCGCCGACCCCCCTAGCGGG  
CGCGGGCGAAGCGGTGCGGCGCCGGCAGGAAGGAAATGGGCGGGGAGGGCCTTCGTGCGT  
CGCCGCGCCCGTCCCTTCTCCATCTCCAGCCTCGGGGCTGCCGCAGGGGGACGGCTGCC  
TTCGGGGGGGACGGGGCAGGGCGGGGTTCGGCTTCTGGCGTGTGACCGGCGGCTCTAGAGC  
CTCTGCTAACCATGTTTCATGCCTTCTTCTTTTCTACAGCTCCTGGGCAACGTGCTGGTTaTT  
GTGCTGTCTCATATTTTGGCAAAGAATTGGCCAAGGAGGCCACCATGGTGAGCAAGGGCG  
AGGAGCTGTTACCGGGGTGGTGCCATCCTGGTCGAGCTGGACGGCGACGTAAACGGCCA  
CAAGTTCAGCGTGTCCGGCGAGGGCGAGGGCGATGCCACCTAgGGCAAGCTGACCCTGAAG  
TTCATCTGCACCACCGCAAGCTGCCCGTGCCCTGGCCACCCTCGTGACCACCCTGACCTA  
CGGCGTGCAGTGCTTCAGCCGCTACCCCGACCACATGAAGCAGCACGACTTCTTCAAGTCCG  
CCATGCCCGAAGGCTACGTCCAGGAGCGCACCATCTTCTTCAAGGACGACGGCAACTACAA  
GACCCGCGCCGAGGTGAAGTTCGAGGGCGACACCCTGGTGAACCGCATCGAGCTGAAGGGC  
ATCGACTTCAAGGAGGACGGCAACATCCTGGGGCACAAGCTGGAGTACAACACTACAACAGCC  
ACAACGTCTgaATCATGGCCGACAAGCAGAAGAACGGCATCAAGGTGAACCTCAAGATCCGC  
CACAACATCGAGGACGGCAGCGTGCAGCTCGCCGACCACTACCAGCAGAACACCCCCATCG  
GCGACGGCCCCGTGCTGCTGCCGACAACCACTACCTGAGCACCCAGTCCGCCCTGAGCAAA  
GACCCCAACGAGAAGCGCGATCACATGGTCTGCTGGAGTTCGTGACCGCCGCGGGATCA  
CTCTCGGCATGGACGAGCTGTACAAGGGGCCCTTCGAACAAAACTCATCTCAGAAGAGGA  
TCTGAATATGCATACCGGTCATCATCACCATCACCATCATCATCACCATCACCATTaAggcctcta  
aggccgaattcaacgcgtaagtgcacaatcaacctctgattacaaaattgtgaaagattgactggtattcttaactatgltgctcctttacgctatgtggat  
acgctgcttaatgctttgatcatgctattgcttcccgatggcttccatttctcctctgtataaatcctggtgctgtctctttatgaggagttggtgcccgtt  
gtcaggcaacgtggcgtggtgtgcaactgtttgctgacgcaacccccactggttggggcattgccaccacctgcaactccttccgggactttcgcttcc  
ccctccctattgccacggcggaactcatcgccgctgcttggcctgctgacaggggctggtggttgggactgacaattccgtggtgtgctgg  
ggaaatcatgctcttcttggctgctgctgtgtgccacctggattctgctgctgctccttctgctacgtcccttggccctcaatccagcggacct  
tcttcccgcggcctgctgcccgtctgccccttccgcttcccttgccttgcctcagacgagtcggatcctccttggggcggcctcccgcgtcgac  
tttaactggccagcacagtggtegategaCCAATGCCCTGGCTCACAAATACCACTGAGATCTTTTTCCCTCT  
GCCAAAAATTATGGGGACATCATGAAGCCCCTTGAGCATCTGACTTCTGGCTAATAAAGGAA  
ATTTATTTTCATTGCAATAGTGTGTTGGAATTTTTTGTGTCTCTCACTCGGAAGGACATATGG  
GAGGGCAAATCATTTAAAACATCAGAATGAGTATTTGGTTTAGAGTTTGGCAACATATGCCc  
ATATGCTGGCTGCCATGAACAAAGGTiGGCTATAAAGAGGTCATCAGTATATGAAACAGCCC  
CCTGCTGTCCATTCCTTATTCCATAGAAAAGCCTTGACTTGAGGTTAGATTTTTTTTATATTT  
GTTTTGTGTTATTTTTTTCTTAAACATCCCTAAAATTTTCCTTACATGTTTACTAGCCAGATT  
TTTCTCCTCTCCTGACTACTCCCAGTCATAGCTGTCCCTCTTcttGCGGCCGCggtccgtatactccgga  
atattaatagatcatggagataaftaaatgataaccatctcgaaataaataagatfttactgtttcgtaacagtttgaataaaaaaacataaatattccg

gattattcataccgtccaccatcgggcgAACTCCTAAAAAACCGCCACCatgaagtgcctttgtacttagccttttattcattggg  
gtgaattgcaagttaccatagttttccacacaacaaaaaggaaactggaaaaatgttccttctaattaccattattgcccgtaagctcagattfaattgg  
cataatgacttaataggcacagccttacaagtcaaaatgcccaagagtcacaaggctattcaagcagacgggtggatgtgcatgcttcaaatgggtcact  
acttggatttccgctggatggaccgaagtatataacacattccatccgatccttactccatctgtagaacaatgcaaggaaagcattgaacaaacgaaa  
caaggaaactggctgaatccaggcttccctcctcaaaagtgtggatatgcaactgtgacggatgccgaagcagtgattgtccagggtactcctcaccatgt  
gctgggtgatgaafacacaggagaatgggtgattcacagttcatcaacggaaaaatgcagcaattacatatgccccactgtccataacttacaacctggca  
ttctgactataaggtcaaagggtatgtgattctaacctcattccatggacatcaccttcttctcagaggacggagagctatcatcctgggaaaggaggg  
cacagggttcagaagtaactcttcttatgaaactggaggcaaggcctgcaaaatgcaactgcaagcattggggagtcagactcccatcagggtgtc  
ggctcagatggctgataaggatctcttctgctgagccagattccctgaatgccagaagggtcaagtatctctgctccatctcagacctcagtggtgtaa  
gtctaattcaggacgttgagaggatcttggattatccctctccaagaacctggagcaaaatcagagcgggtcttcaatctctccagtggtatctcagct  
atcttctcctaaaaaccaggaaccgtcctgcttccacataatcaatgggtaccctaaaatactttgagaccagatacatcagagtcgatattgtgctcc  
aatcctctcaagaatggctggaatgatcagtggaactaccacagaaagggaactgtgggatgactgggcaccatagaagacgtggaattggacccaa  
tggagttctgaggaccagttcaggatataagtttcttatacatgattggacatggtatgttgactccgatcttcatcttagctcaaaggctcagggttcca  
acatcctcacattcaagacgctcctcgaactcctgatgatgagagttatTTTTTGGTGATACTGGGCTATCAAAAATCCAATCAGCTTGTAGAAGGTG  
gttcagtagttgaaaagctctattgctctTTTTTcttatacatagggtaacattggactattcttggttctccgagttggtatccatcttgcattaaatfaagc  
acaccaagaaaagacagattatacagacatagagatgaaccgacttgaaagtataacgagaagtactagaggatcataatcagccataccacattg  
tagaggTTTTacttcttAAAAACCTCCACACCTCCCCGAACTGAAACATAAAATGAATGCAATGTTGTTAACTGTTATTGCAGCTATAATGGTT  
acaaataaagcaatagcatcacaattcacaataaagcatttttactgcatcttagttgtggtttgtccaaactcaatgtatcttatcatgtctggatct  
gatcactgcttgagcctaggagatccgaaccagataagtgaaatctagtccaaacttttgcatttttaatttctgattagcttacgacgctacaccagtt  
cccactatTTTgcactctccctaaataatccttaaaaactccatttccaccctcccagttcccaactatTTTgtcccacagcggggcatttttctctgt  
tatTTTTaatcaaacatcctgccaactccatgtgacaaaccgtcatcttccgctactt
